# Supplementary material for: Single-molecule neuromorphic device
Source: Research Square preprint supplement (doi:10.21203/rs.3.rs-7679516/v1), 2025-11-11
Supplement: Supplementary file 1 [file df8e3e0067d62ef505e8df77.docx]

Supplementary Information for

**Single-molecule neuromorphic device**

Hua Zhang1,2,3†, Jingyao Ye1†, Mingbin Gao1†, Chenshuai Yan1, Yiqiang Jiang1, Bei Zhang1, Yu Zhou1, Wansong Shang2,3, Liangliang Chen2,3, Jiayi Wu1, Wei Xu1, Xiaohui Li1, Jie Bai1, Jing Li1, Yanxi Zhang1, Guanxin Zhang2,3, Zongyuan Xiao1, Jia Shi1, Junyang Liu1*, Deqing Zhang2,3*, Wenjing Hong1*

Corresponding author: whong@xmu.edu.cn (W. Hong); dqzhang@iccas.ac.cn (D. Zhang); jyliu@xmu.edu.cn (J. Liu)

**Table of Contents**

S1. Materials and methods………………………………………………………………………...3

S2. Charge transport characterizations………………………………………………………….....3

S3. Mimicking synaptic plasticity through a single-molecule device………………………...........9

S4. Mechanism of neuromorphic devices constructed with a single molecule as the component...24

S5. **Movie S1**: Ion migration under bidirectional electric fields (*X*/*Y*-axes) simulated via non-equilibrium molecular dynamics.…………………………………………….………..................31

**S1. Materials and methods**

**Fig. S1 Syntheses of MeO-TBT and Et-TBT.**

**S2. Charge transport characterizations**


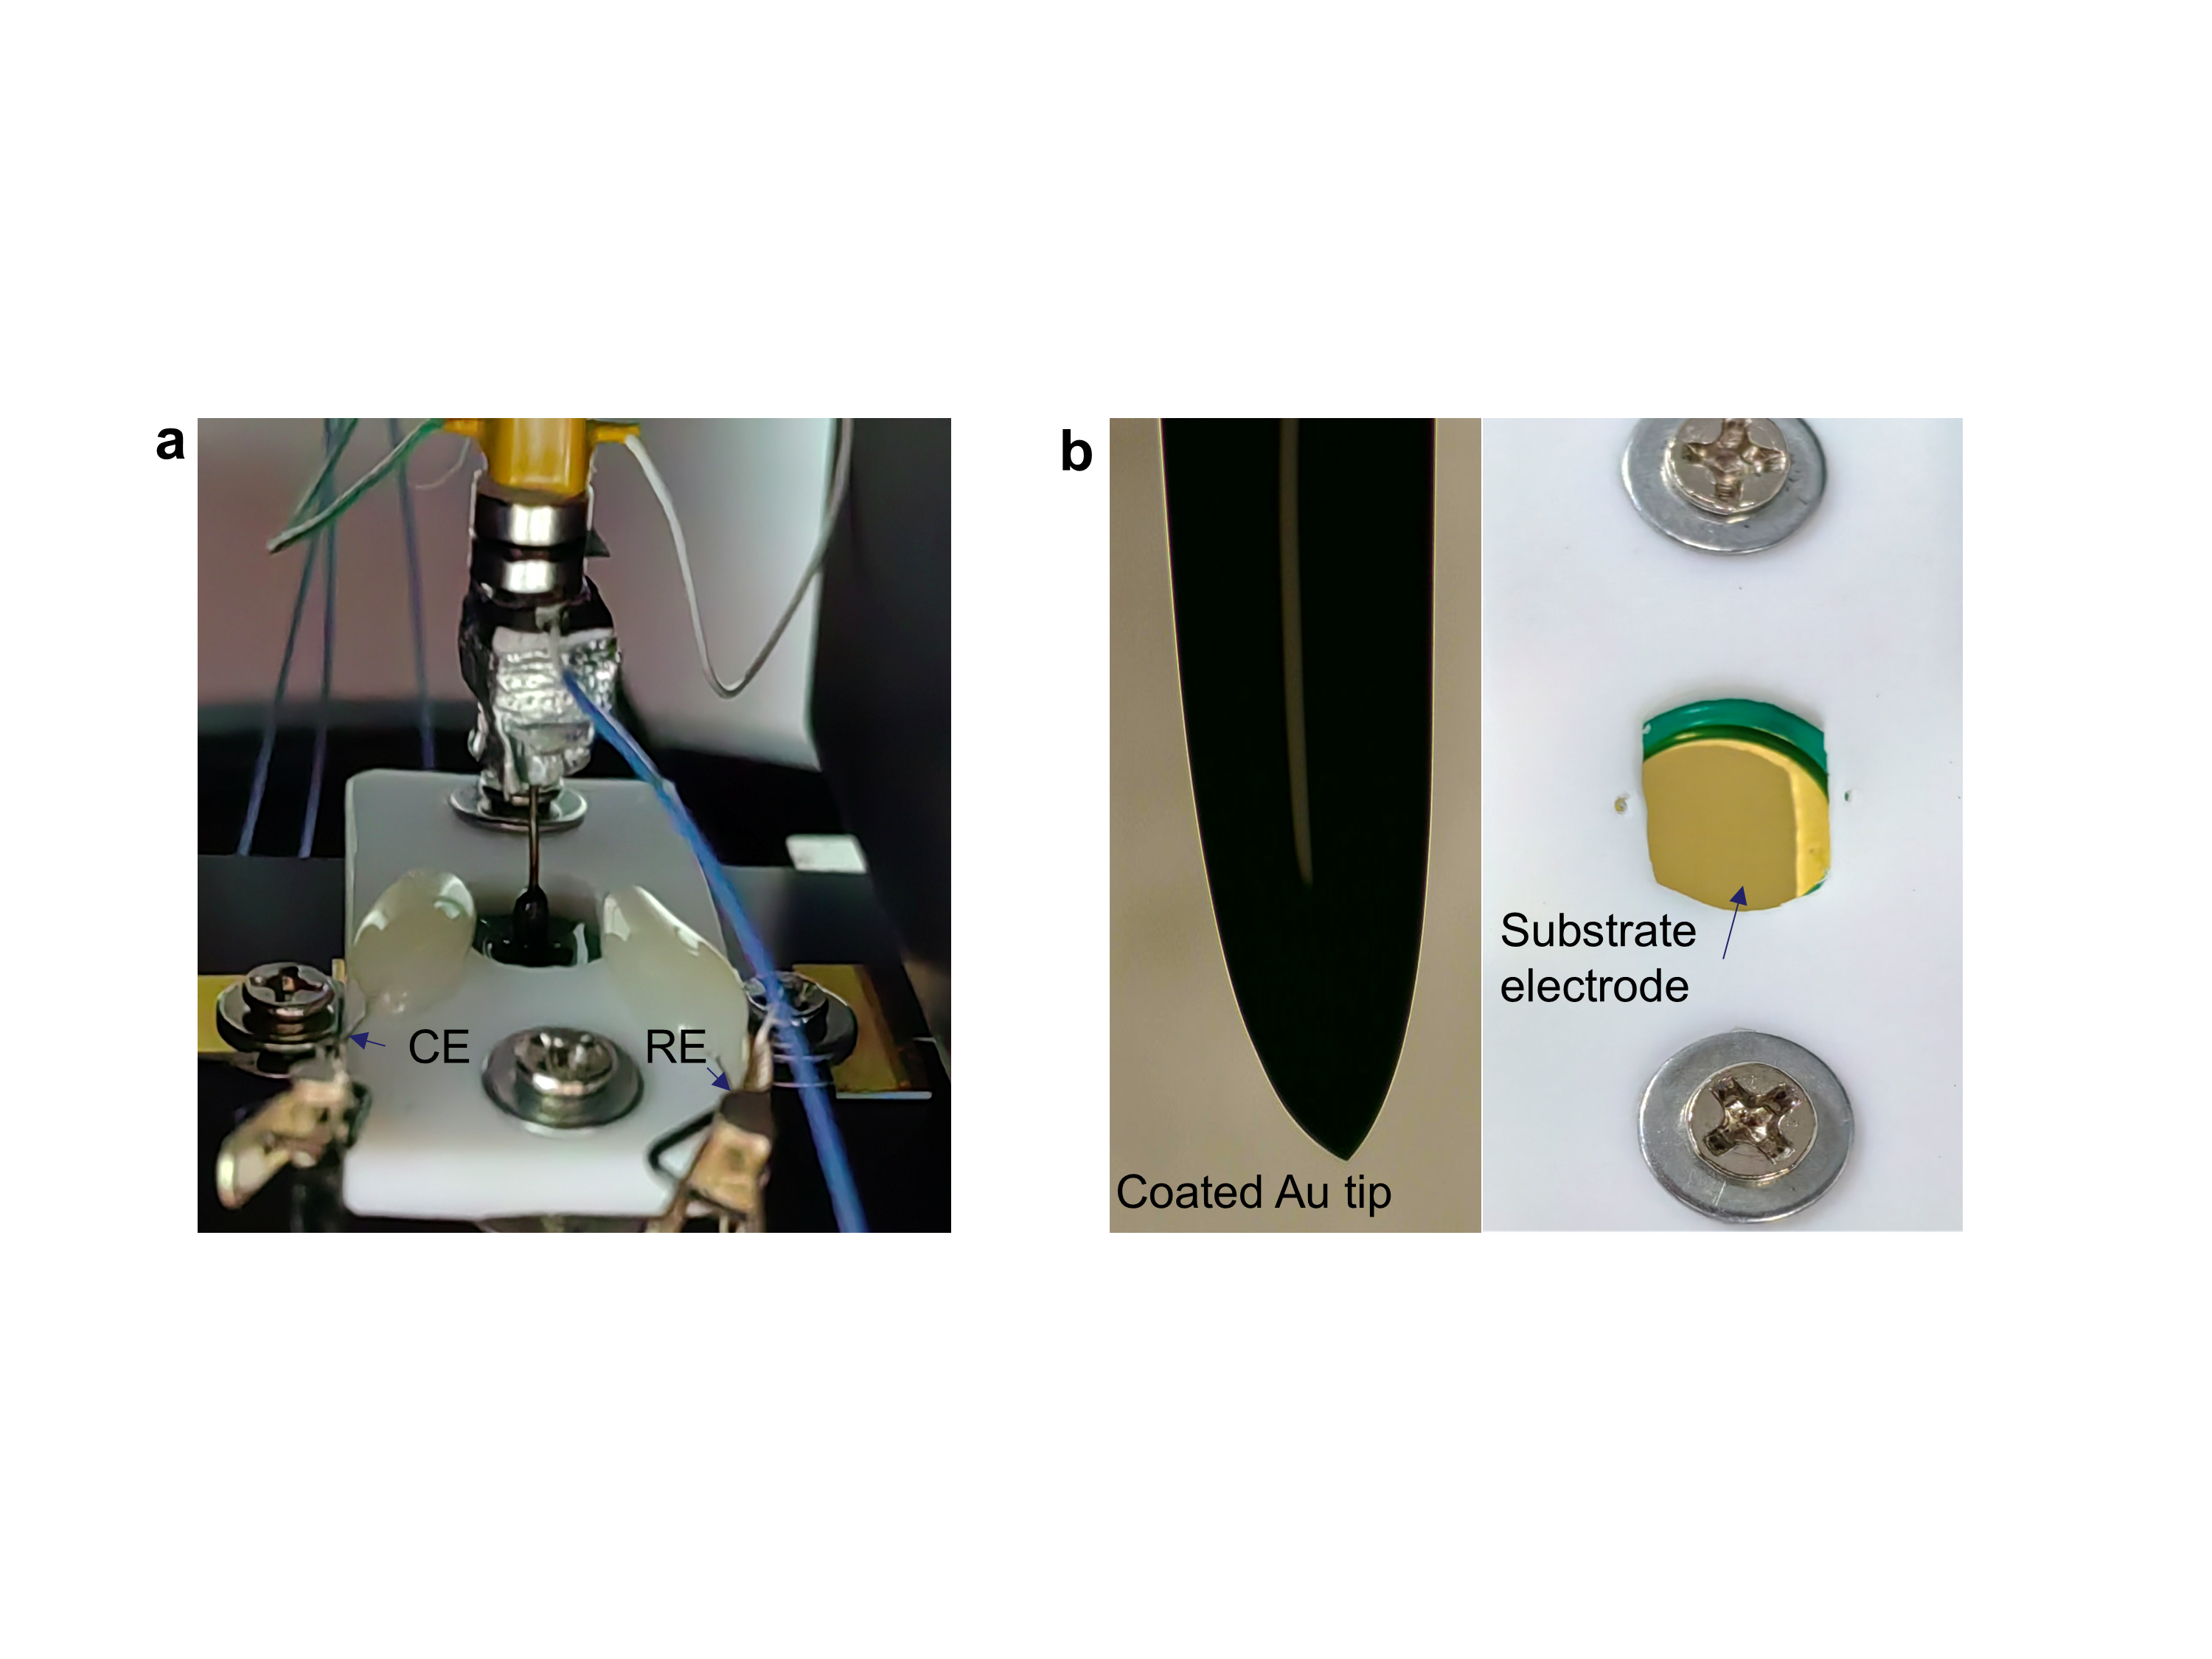


**Fig. S2 Physical diagram of** **electrochemically gated scanning tunneling microscope break junction technique. a,** Photo of the test device. **b,** Photos of a coated Au tip and a substrate electrode.


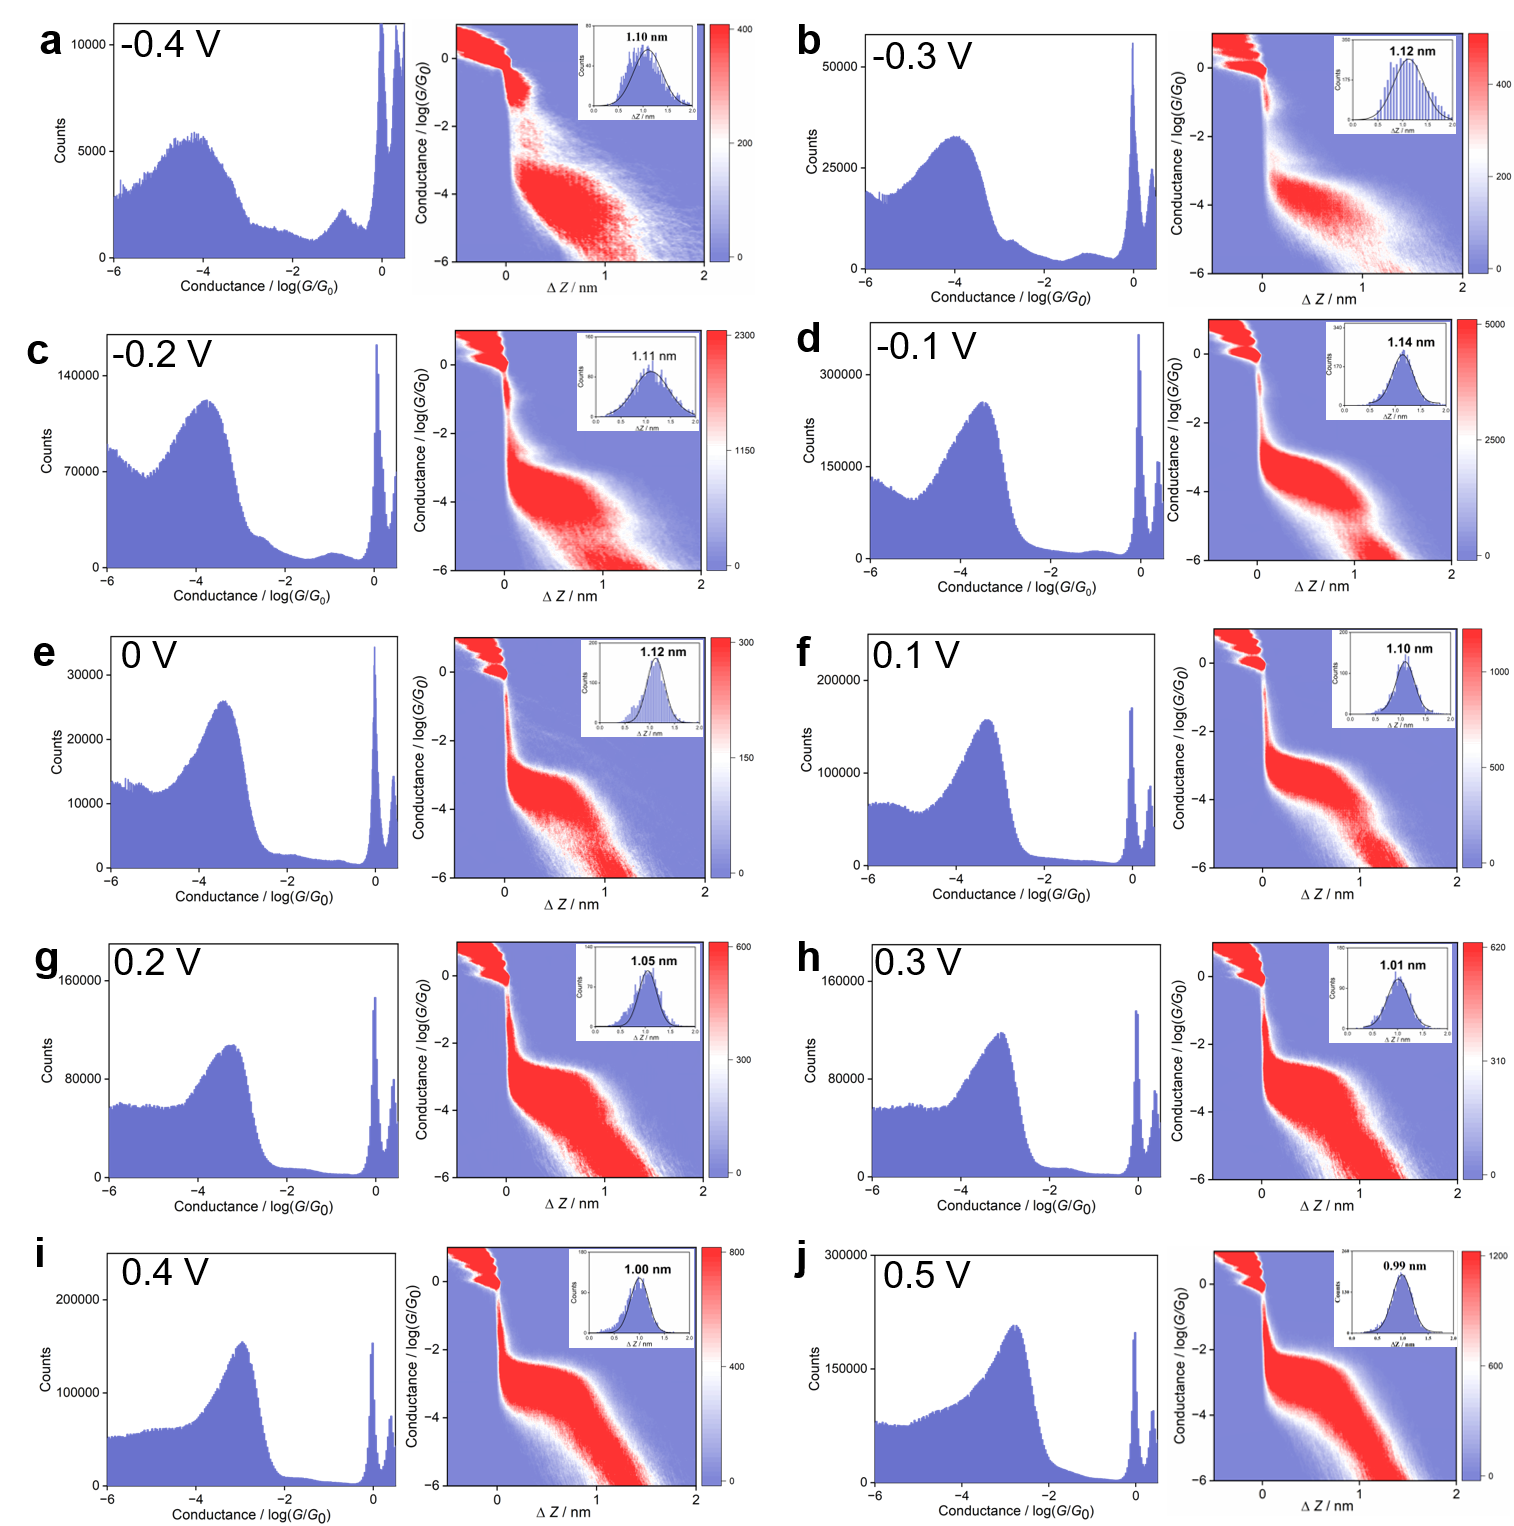


**Fig. S3 Measurement of single molecule conductance of 0.5 mM MeO-TBT in propylene carbonate solution (PC) of 0.1 M tetrabutyl ammonium hexafluorophosphonate (TBAPF6) at the electrode potentials in non-Faraday region (gate voltage *V*G = -0.4 V~0.5 V) under 0.1 V bias.** **a-j,** One-dimensional (1D) conductance histograms, two-dimensional (2D) conductance histograms (over 2000 traces) and relative displacement distributions (inset) of **MeO-TBT** junctions at the electrode potential of -0.4 V~0.5 V (gate voltage *V*G = -0.4 V~0.5 V) and at 0.1 V bias voltage.





**Fig. S4 Non-Faradaic conductance variation.** Measurement of single molecule conductance of 0.5 mM **MeO-TBT** in PC solution of 0.1 M TBAPF6 at the electrode potentials in non-Faraday region (gate voltage *V*G = -0.4 V~0.5 V) under 0.1 V bias.


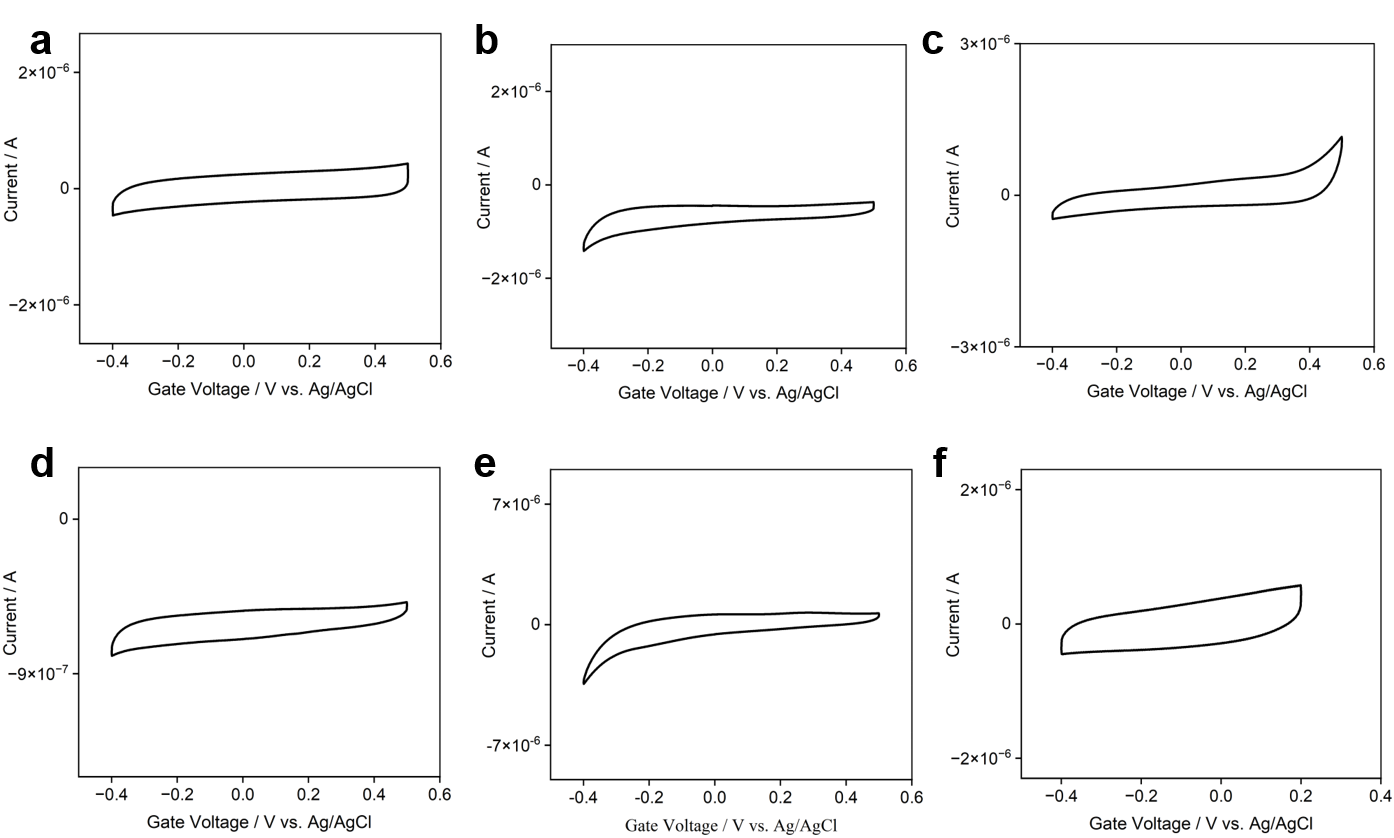


**Fig. S5 The influence of electrolyte concentration, type, and solvent on the cyclic voltammetry test of MeO-TBT within the non-Faraday region. a,** The cyclic voltammetry curve of 0.5 mM **MeO-TBT** in PC of 0.1 M TBAPF6 at the electrode potentials in non-Faraday region (gate voltage *V*G = –0.4~0.5 V). **b,** The cyclic voltammetry curve of 0.5 mM **MeO-TBT** in PC of 0.2 M TBAPF6 at the electrode potentials in non-Faraday region (gate voltage *V*G = –0.4~0.5 V). **c,** The cyclic voltammetry curve of **MeO-TBT** in PC of 0.2 M tetrabutylammonium tetrafluoroborate at the electrode potentials in non-Faraday region (gate voltage *V*G = –0.4~0.5 V). **d,** The cyclic voltammetry curve of **MeO-TBT** in PC of 0.2 M bistrifluoromethanesulfonimide lithium salt at the electrode potentials in non-Faraday region (gate voltage *V*G = –0.4~0.5 V). **e,** The cyclic voltammetry curve of 0.5 mM **MeO-TBT** in 1-hexyl-3-methylimidazolium hexafluorophosphate at the electrode potentials in non-Faraday region (gate voltage *V*G = –0.4~0.5 V). **f,** 0.5 mM **MeO-TBT** in acetonitrile solution of 0.2 M TBAPF6 at the electrode potentials in non-Faraday region (gate voltage *V*G = –0.4~0.2 V).





**Fig. S6 The cyclic voltammetry curve of 0.5 mM MeO-TBT in PC of 0.05 M TBAPF6 at the electrode potentials in non-Faradaic region (gate voltage *V*G = –0.4~0.5 V).**


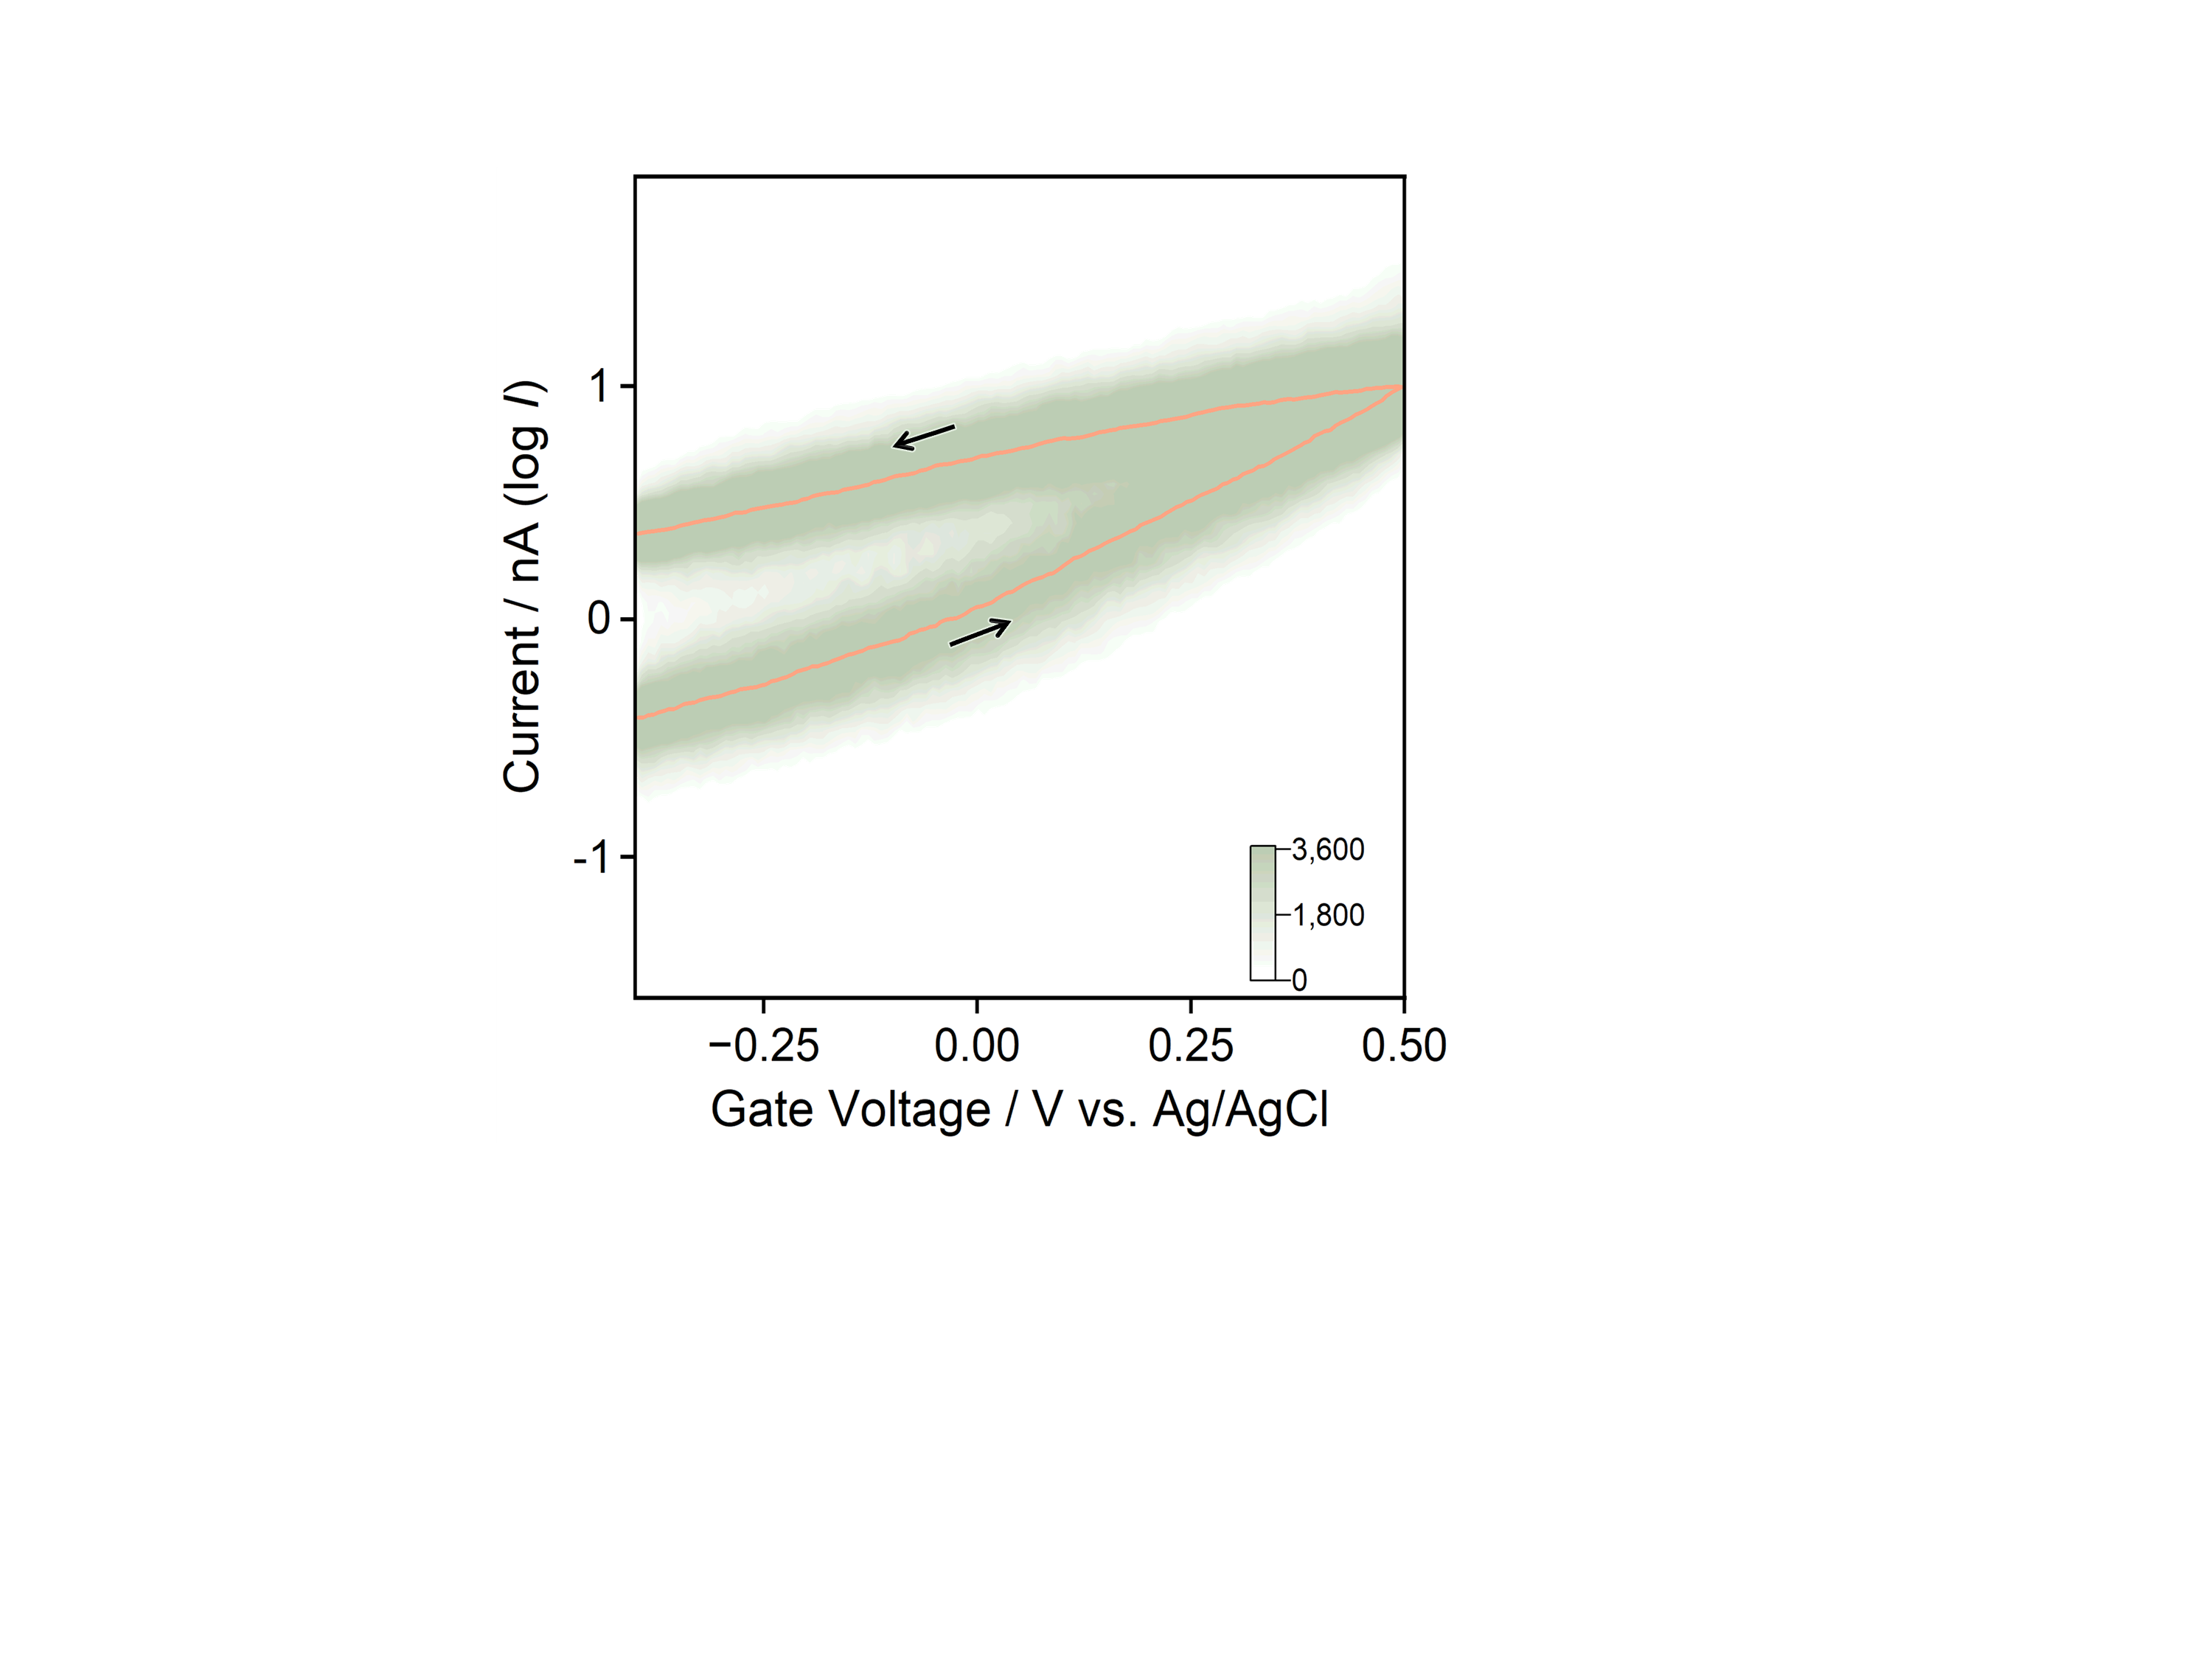


**Fig. S7 Statistical transfer characteristic (*I*-*V*G) curves (991 traces) illustrate both forward and reverse scans, and fitting curves (depicted in the inset) for single-molecule transistors utilizing 0.5 mM MeO-TBT in PC solution of 0.2 M TBAPF6 at the electrode potentials (gate voltage *V*G = –0.4~0.5 V) in non-Faradaic region under 0.1 V bias.**


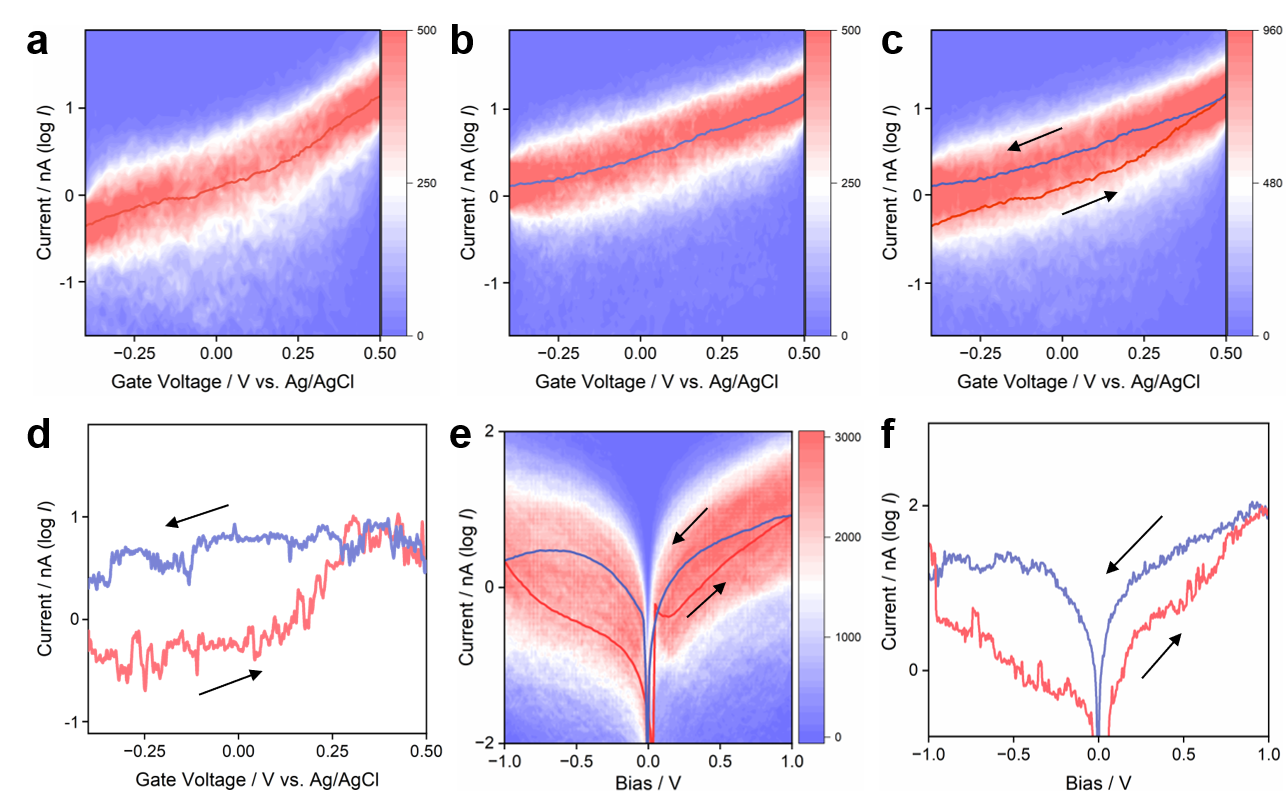


**Fig. S8 Single-molecule electrochemical transistor based on MeO-TBT with intramolecular O-S noncovalent interaction.** **a, b,** **c,** Statistical transfer characteristic (*I*-*V*G) curves (over 400 traces) illustrate both forward and reverse scans, and fitting curves (depicted in the inset) for single-molecule transistors utilizing 0.5 mM **MeO-TBT** in PC solution of 0.1 M TBAPF6 at the electrode potentials (gate voltage *V*G = –0.4 V~0.5 V) in non-Faraday regionunder 0.1 V bias. **d,** Typical single forward and reverse *I*-*V*G curves for single-molecule transistors utilizing 0.5 mM **MeO-TBT** in PC solution of 0.1 M TBAPF6 at the electrode potentials (gate voltage *V*G = –0.4 V~0.5 V) in non-Faraday regionunder 0.1 V bias. The orange curve represents the forward scan data, while the blue curve corresponds to the reverse scan data. **e, f,** Statistical *I*-*V*B characteristic curves (over 2000 traces) and fitting curves (depicted in the inset) represent both forward and reverse scans, along with typical single forward and reverse *I*-*V*B curves at the electrode potential of –0.4 V for single-molecule transistors utilizing 0.5 mM **MeO-TBT** in PC solution of 0.1 M TBAPF6. The orange curve represents the forward scan data, while the blue curve corresponds to the reverse scan data.


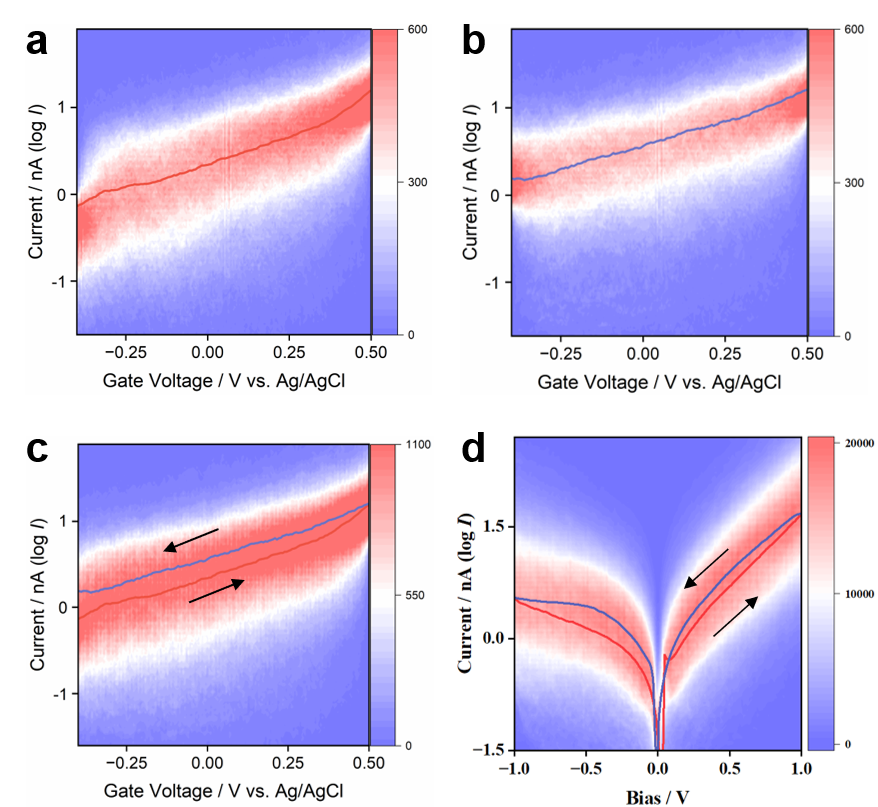


**Fig. S9 The influence of electrolyte concentration on single-molecule transistors utilizing MeO-TBT. a, b, c,** Statistical *I*-*V*G curves (over 400 traces) illustrate both forward and reverse scans, and fitting curves for single-molecule transistors utilizing 0.5 mM **MeO-TBT** in PC solution of 0.05 M TBAPF6 at the electrode potentials (gate voltage *V*G = –0.4~0.5 V) under 0.1 V bias. **d,** Statistical *I*-*V*B characteristic curves (over 2000 traces) and fitting curves (depicted in the inset) represent both forward and reverse scans at the electrode potential of –0.4 V for single-molecule transistors utilizing 0.5 mM **MeO-TBT** in PC solution of 0.05 M TBAPF6. The orange curve represents the forward scan data, while the blue curve corresponds to the reverse scan data.


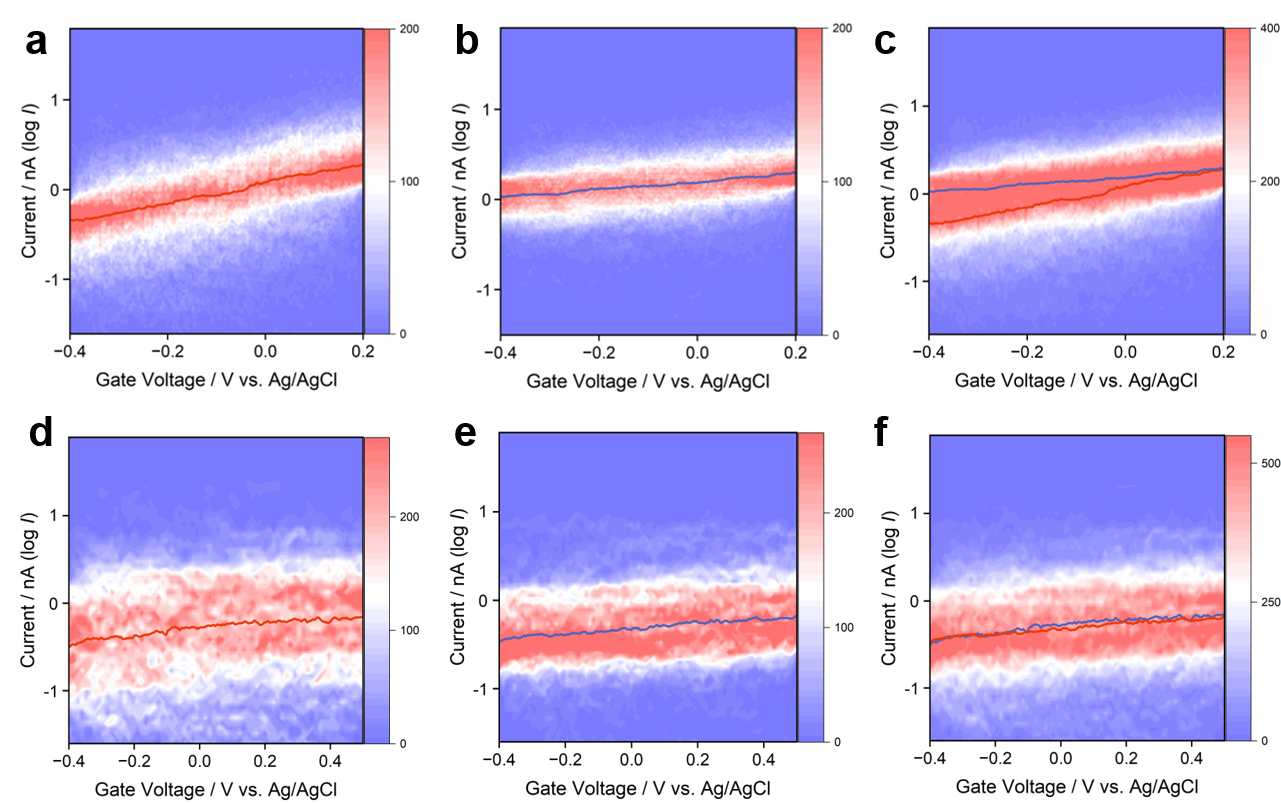


**Fig. S10 The influence of solvent on *I*-*V*G curves of forward and reverse scanning for single-molecule transistors utilizing MeO-TBT.** **a, b, c,** Statistical *I*-*V*G curves (over 400 traces) illustrate both forward and reverse scans, and fitting curves (depicted in the inset) for single-molecule transistors utilizing 0.5 mM **MeO-TBT** in acetonitrile solution of 0.2 M **TBAPF6** under 0.1 V bias. **d, e, f,** Statistical *I*-*V*G curves (over 200 traces) illustrate both forward and reverse scans, and fitting curves (depicted in the inset) for single-molecule transistors utilizing 0.5 mM **MeO-TBT** in 1-hexyl-3-methylimidazolium hexafluorophosphate solution under 0.1 V bias.


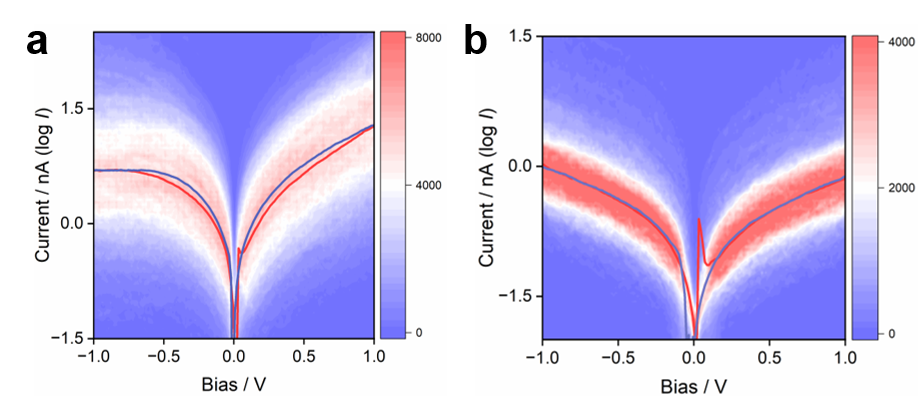


**Fig. S11 The influence of solvent on the *I*-*V*B curves during forward and reverse scanning of single-molecule transistors that employ MeO-TBT is investigated. a,** Statistical *I*-*V*B curves (over 2000 traces) illustrate both forward and reverse scans, along with the fitting curves (depicted in the inset), for single-molecule transistors utilizing 0.5 mM **MeO-TBT** in acetonitrile solution of 0.2 M TBAPF6at the electrode potential of –0.4 V for single-molecule transistors. The orange curve represents the forward scan data, while the blue curve corresponds to the reverse scan data. **b,** Statistical *I*-*V*B curves (over 2000 traces) illustrate both forward and reverse scans, along with the fitting curves (depicted in the inset), for single-molecule transistors utilizing 0.5 mM **MeO-TBT** in 1-hexyl-3-methylimidazolium hexafluorophosphate at the electrode potential of –0.4 V for single-molecule transistors.

**S3. Mimicking synaptic plasticity through a single-molecule device**

This study systematically compares the key performance parameters of reported neuromorphic devices, demonstrating the remarkable advantages of our developed device. As shown in Table S1, we have summarized and analyzed the critical parameters of neuromorphic devices: (1) energy consumption per operation, which directly determines the energy efficiency of the device; (2) working electrode spacing, reflecting the integration density limit of the device; and (3) device type, including typical systems such as single-molecular-layer devices, organic thin-film devices, and carbon nanotube devices. It is particularly noteworthy that our device achieves an ultralow energy consumption of ~0.8 aJ (1 aJ = 10-18 J) per operation (Figs. S13 and S14), while simultaneously realizing a working electrode spacing of only ~1.5 nm. It should be noted that the comparative data cited in the table are either directly obtained from values explicitly reported in the literature or reasonably estimated by analyzing graphical data and textual descriptions in the references. The mutual breakthroughs in energy consumption, device size, and conductance states demonstrate the unique properties of our device in the fields of neuromorphic computing and low-power electronics.


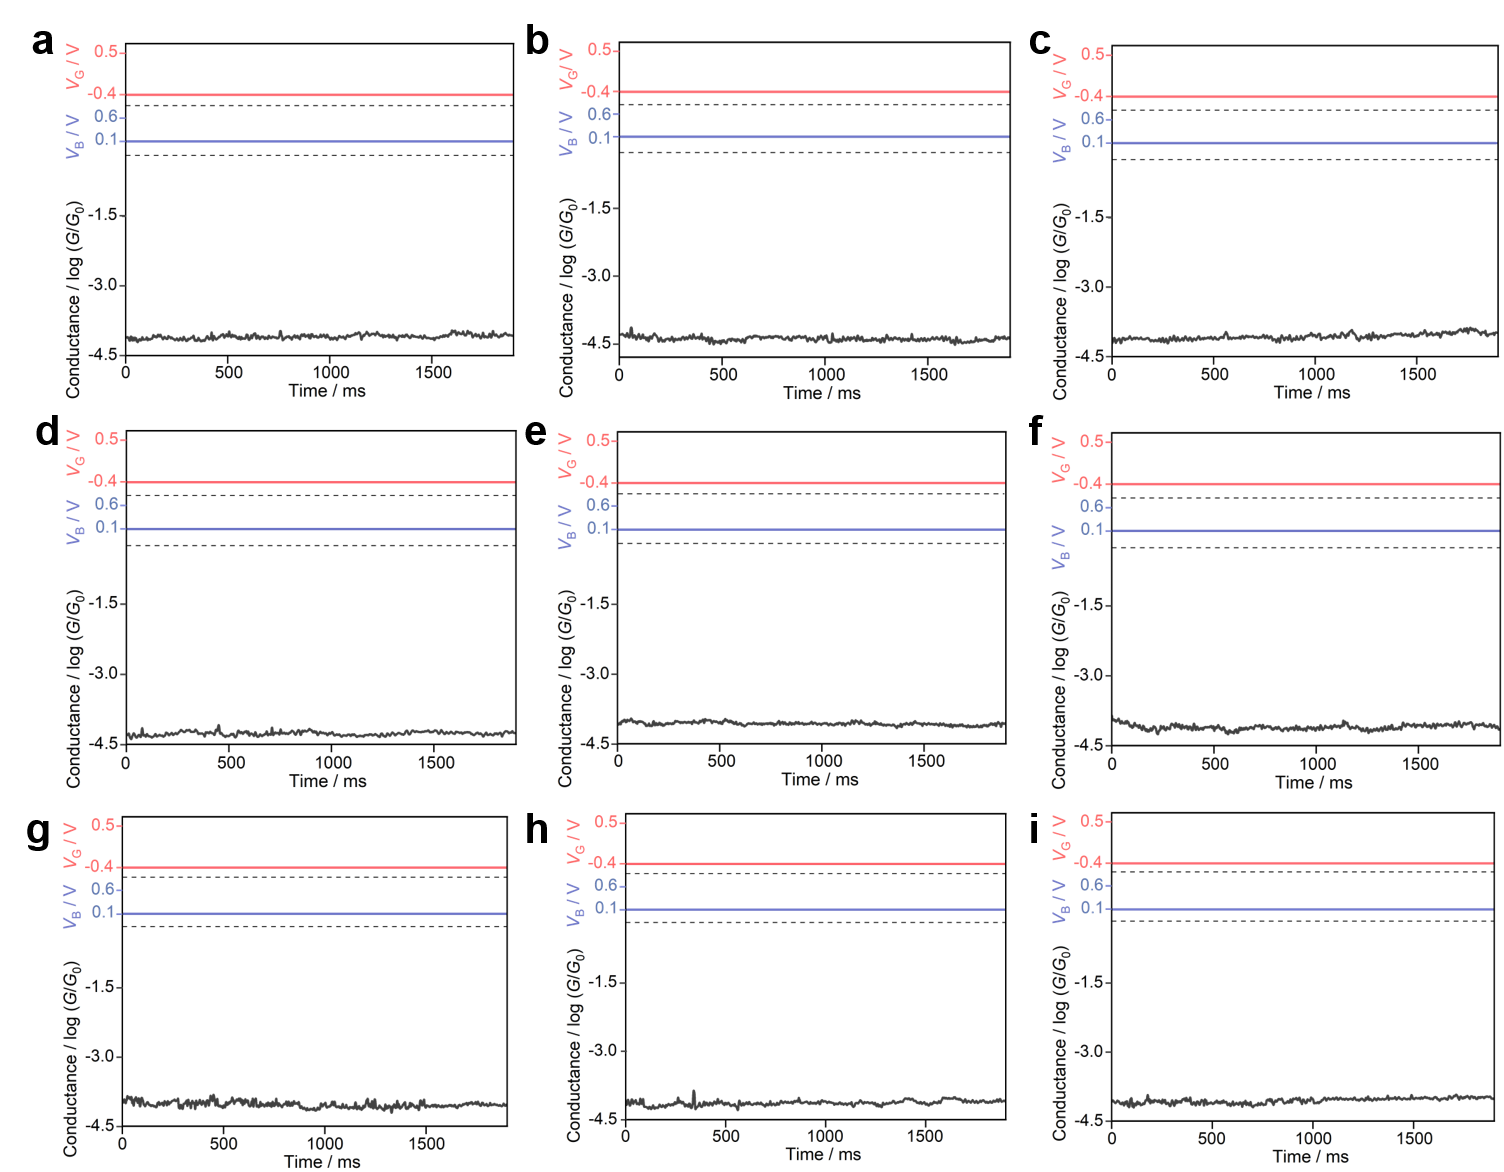


**Fig. S12 Conductance of the single-molecule organic electrochemical transistor at –0.4 V gate voltage and 0.1 V bias voltage utilizing** **MeO-TBT without electric pulse stimulation.**


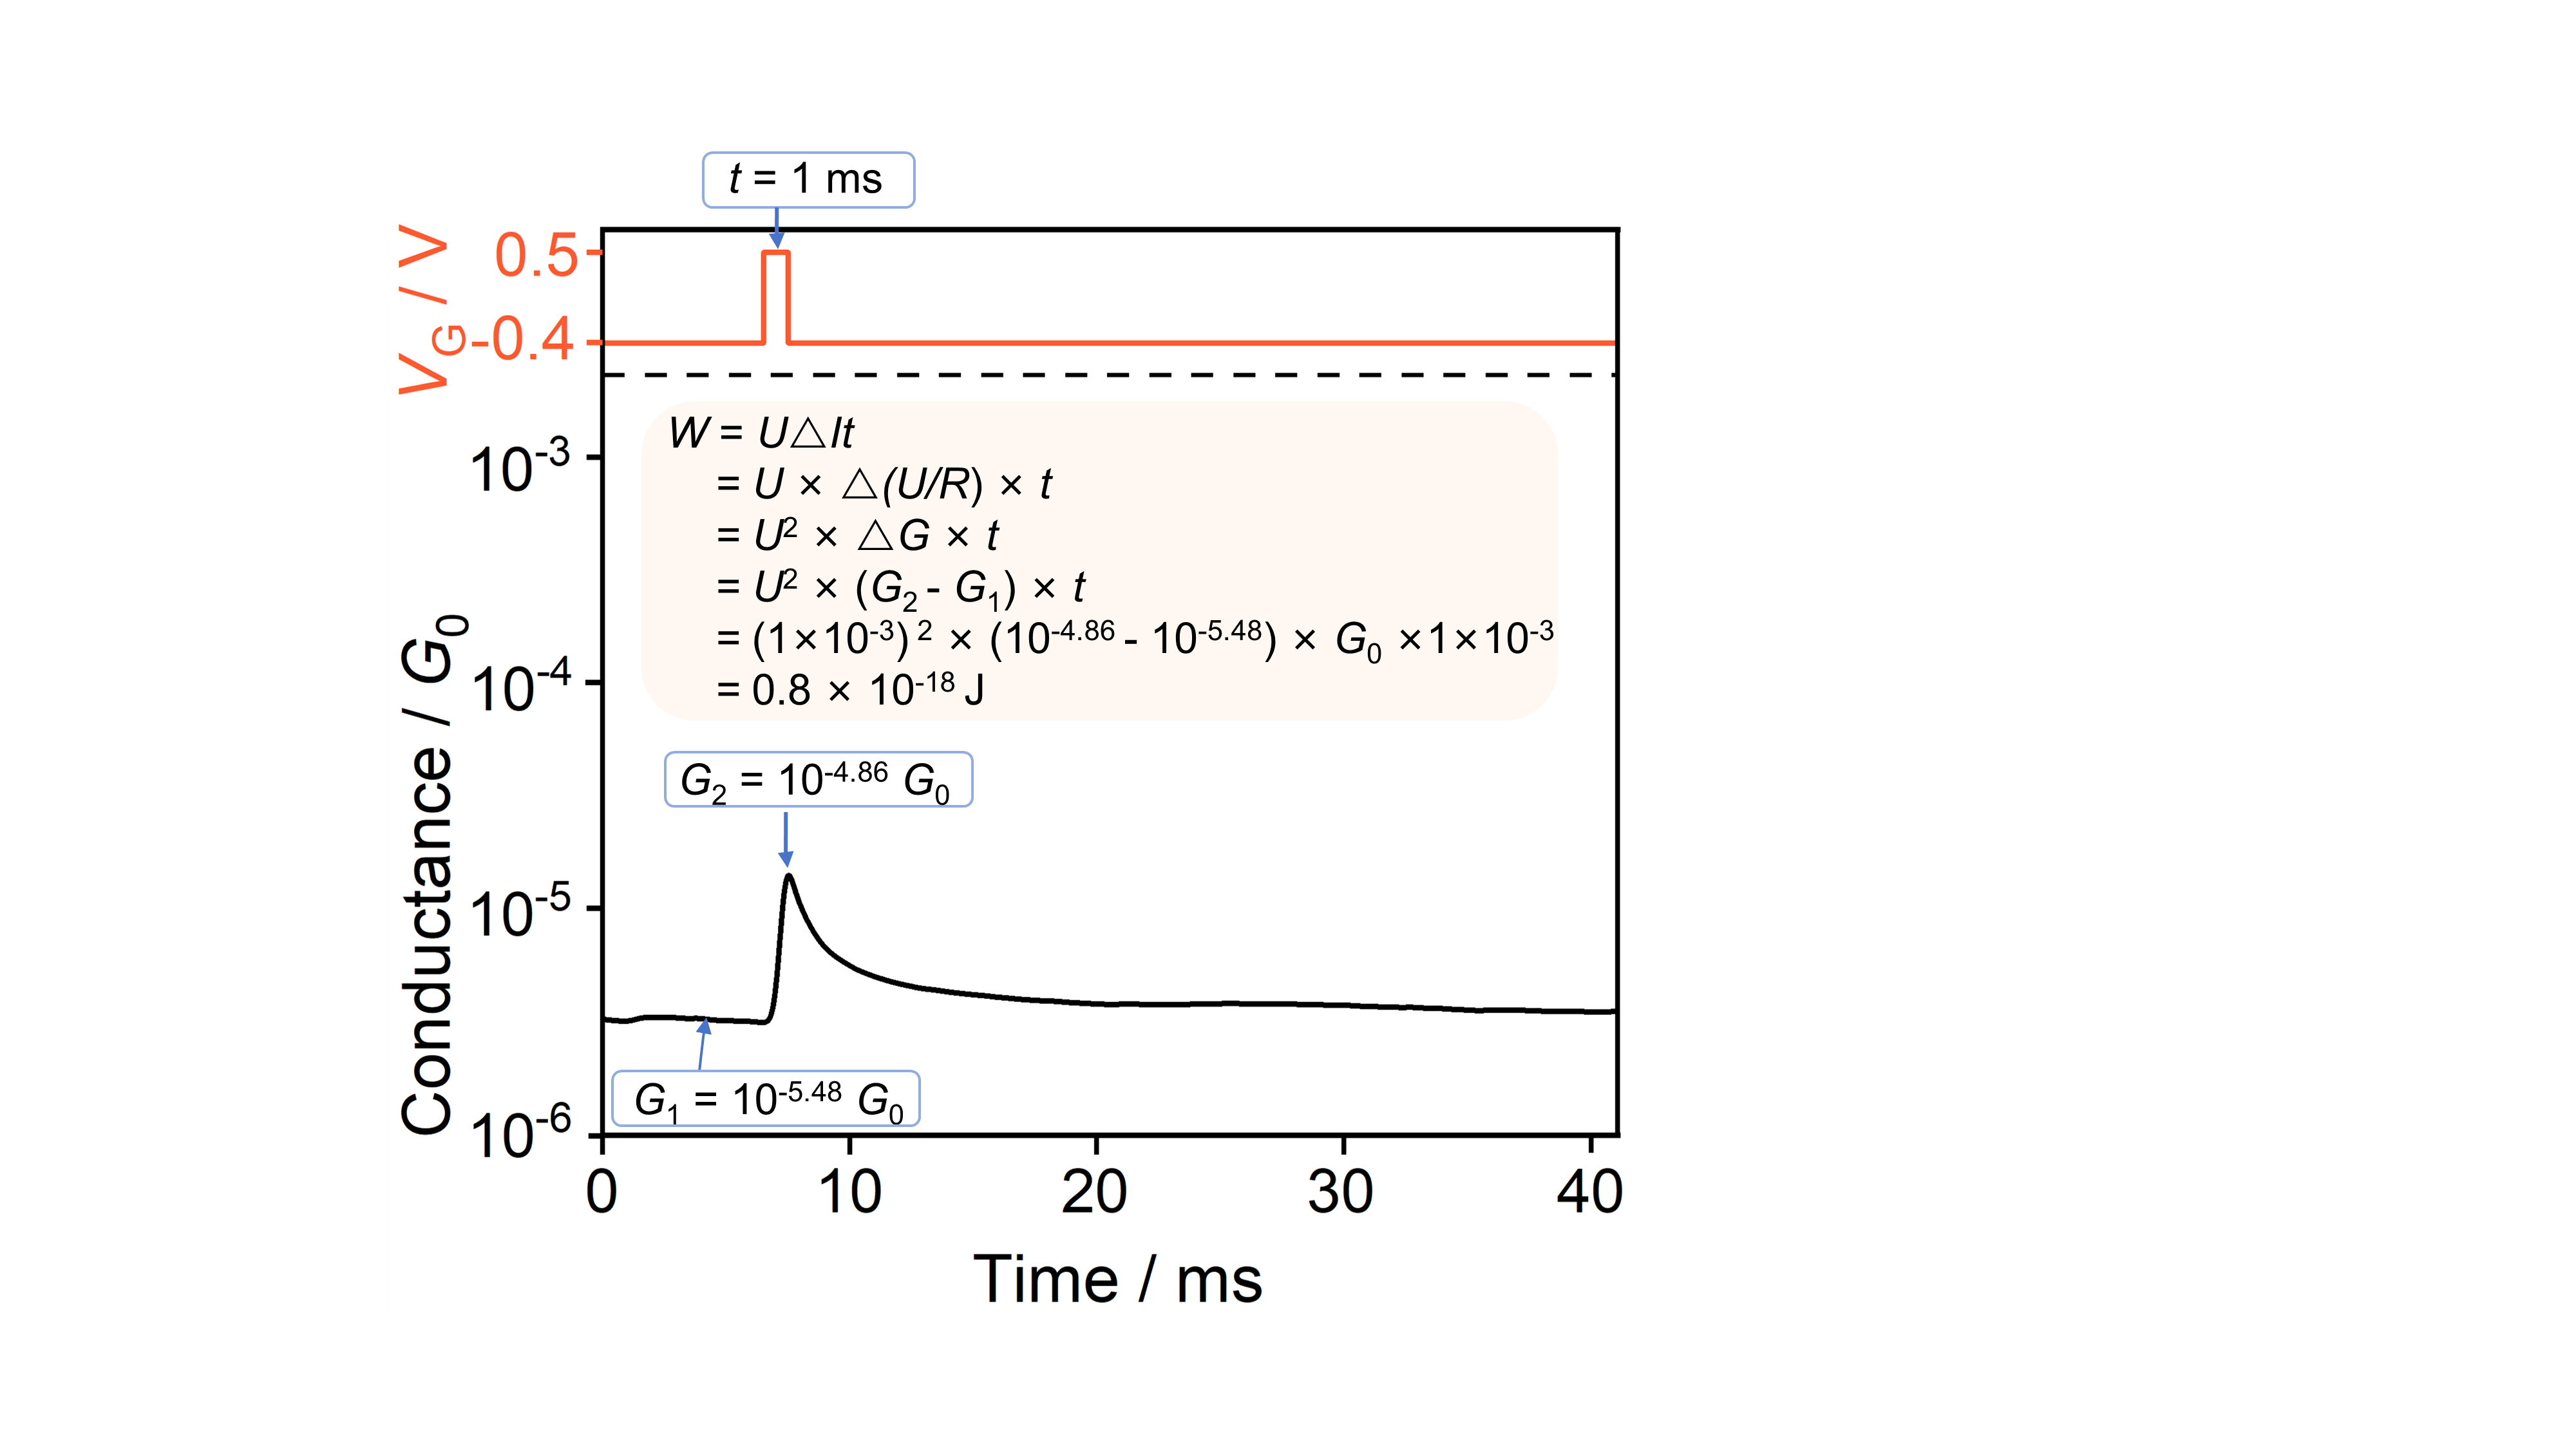


**Fig. S13 Calculation of single-operation energy consumption in a single-molecule device.** Operating conditions: 1 mV bias voltage, 1 ms pulse width. Based on the formula *W* = *UIt*, where *G*₀ = 77500 nS, the calculated energy consumption per switching event can reach as low as ~ 0.8 aJ (1 aJ = 1 × 10-18 J).


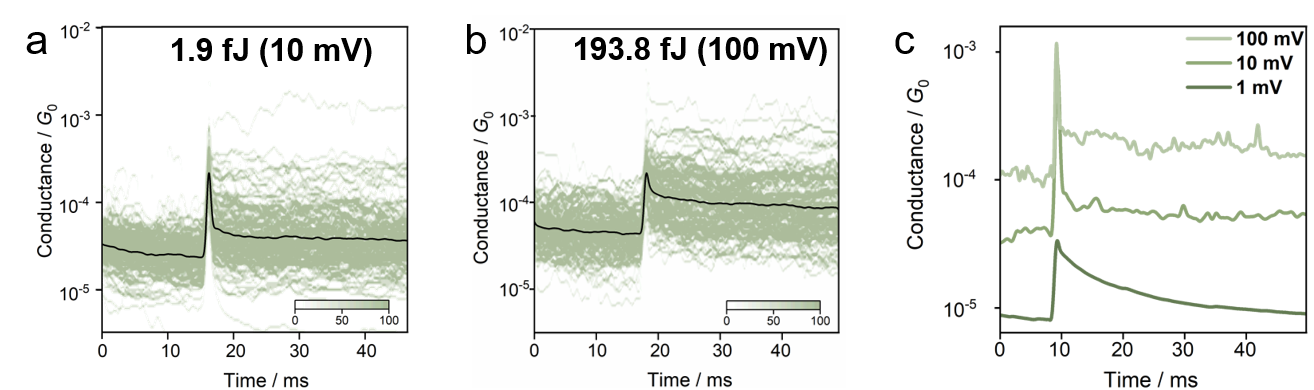


**Fig. S14 Energy consumption comparison of single-molecule devices. a and b**, Statistical conductance of single-molecule devices under a single *V*G pulse ranging from –0.4 V to 0.5 V were investigated at operating *V*Bs of 10 mV (116 traces), and 100 mV (122 traces), respectively. And the black curve is the fitting curve of these traces (depicted in the inset). **c**, Comparative plot of operating energy consumption for a single-molecule device under different bias voltages (single curve).

**Table S1 Comparison of energy consumption among neuromorphic devices of different channel lengths**

| **The lowest energy consumption per synaptic event / J** | **Channel length / m** | **reference** | **Marking symbol** | **Device type** |
| --- | --- | --- | --- | --- |
| (0.8~2.8) × 10-18 | ~1.50 × 10-9 | This work | 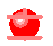 | Single-molecule device |
| 3.9 × 10-5 | Monolayer with a thickness of 2.40 × 10-9 | 1 | 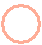 | Single-molecule layer device |
| 6.6 × 10-13 | 1.5 × 10-7 | 2 | 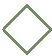 | Bioinspired nanofluidics |
| ~1.2 × 10-15 | 3.0 × 10-7 | 3 | 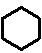 | Organic nanowire neuromorphic devices |
| ~3.5 × 10-11 | 1.0 × 10-4 | 4 | 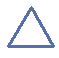 | Organic neuromorphic device |
| ~1.8 × 10-10 | 5.0 × 10-5 | 5 | 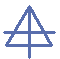 | Organic neuromorphic device |
| ~2.0 × 10-11 | 1.0 × 10-6 | 6 | 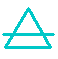 | Neuromorphic devices fabricated from WSe2 (2D material) |
| ~2.0 × 10-10 | 2.1 × 10-4 | 7 | 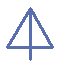 | Organic neuromorphic device |
| ~2.2 × 10-12 | 2.0 × 10-4 | 8 | 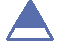 | Organic neuromorphic device |
| ~3.0 × 10-14 | 3.0 × 10-8 | 9 | 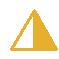 | Neuromorphic devices fabricated from metal oxide |
| ~3.9 × 10-9 | 5.0 × 10-7 | 10 | 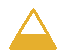 | Neuromorphic devices fabricated from metal oxide |
| ~2.0 × 10-15 | 1.5 × 10-5 | 11 | 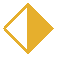 | Neuromorphic devices fabricated from metal oxide |
| ~1.8 × 10-7 | 4.0 × 10-5 | 12 | 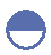 | Organic neuromorphic device |
| ~5.7 × 10-8 | 5.0 × 10-5 | 13 | 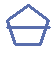 | Organic neuromorphic device |
| ~6.0 × 10-17 | 3.0 × 10-8 | 14 | 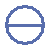 | Organic neuromorphic device |
| ~3.1 × 10-5 | ~5 × 10-6 | 15 | 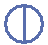 | Organic neuromorphic device |
| ~2.9 × 10-5 | ~1.0 × 10-4 | 16 | 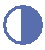 | Organic neuromorphic device |
| ~1.1 × 10-8 | 4.0 × 10-5 | 17 | 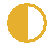 | Neuromorphic devices fabricated from metal oxide |
| ~3.2 × 10-6 | ~1.0 × 10-7 | 18 | 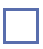 | Neuromorphic devices fabricated from metal oxide nanowires and organic nanowires |
| 1.5 × 10-17 | 4.0 × 10-5 | 19 | 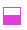 | Neuromorphic devices fabricated from single-walled carbon nanotubes |
| 1.5 × 10-7 | 1.0 × 10-4 | 20 | 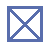 | Organic neuromorphic device |
| 5.7 × 10-14 | 2.0 × 10-4 | 21 | 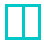 | Neuromorphic devices fabricated from few-layer graphene films(2D material) |
| 1.3 × 10-14 | 2.0 × 10-6 | 22 | 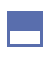 | Organic neuromorphic device |
| 6.2 × 10-12 | 1.5 × 10-7 | 23 | 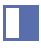 | Organic neuromorphic device |
| 6.5 × 10-18 | 2.0 × 10-5 | 24 | 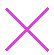 | Neuromorphic devices fabricated from single-walled carbon nanotubes |
| 2.0 × 10-13 | 1.0 × 10-8 | 25 | 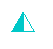 | Graphene/hexagonal boron nitride(2D material) |
| 4.2 × 10-10 | 1.8 × 10-7 | 26 | 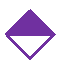 | CMOS transistor |
| 2.8 × 10-12 | 2 × 10-7 | 27 | 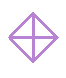 | Neuromorphic devices fabricated from 2D halide perovskite |
| 1.2 × 10-8 | 2 × 10-7 | 28 | 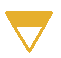 | Neuromorphic devices fabricated from metal oxide |
| 1.9 × 10-15 | 4 × 10-8 | 29 | 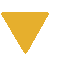 | Neuromorphic devices fabricated from metal oxide |
| 7.2 × 10-7 | (1 - 2) × 10-9 | 30 | 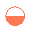 | Single-molecule layer device |
| ~2.6 × 10-14 | 1.1 × 10-6 | 31 | 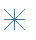 | Neuromorphic devices fabricated from organometallic compounds |
| 2.3 × 10-17 | Sub-1.0 × 10-6 | 32 | 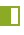 | Nanoelectromechanical devices (NEMS) |
| 3.0 × 10-18 (Projected) | 5.0 × 10-8 (Projected) | 33 | 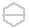 | Silicon complementary metal-oxide-semiconductor (Si CMOS) |
| 1.0 × 10-17 (Projected) | 1.0 × 10-7 (Projected) | 34 | 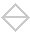 | Nanoelectromechanical devices (NEMS) |

We separately applied the separate gate voltage pulse, the separate bias pulse, and combined gate and bias voltage pulses to the device in hover mode (Figs. S15-21). It was found that the device effectively emulated short-term synaptic plasticity under combined gate and bias voltage pulses. We further explored by adjusting the pulse amplitude of the bias voltage, observing that with increased amplitude, the conductance tunability of the device also increased. Additionally, when pulses of varying duration were applied, the post-excitatory conductance increased with longer pulse duration. We successfully employed single-molecule transistors to mimic short-term plasticity, specifically paired-pulse facilitation (PPF), which plays a critical role in decoding temporal information in the nervous system. To achieve PPF simulation, different modes of pulsed voltage were applied to the gate and working electrodes of the transistors. As shown in Fig. S18, when two consecutive voltage pulses (*V*G = –0.4~0.5 V, *V*B = 0.1~0.6 V, *t*p = 50 ms) were applied with intervals ranging from 10 to 300 ms, a pair of post-synaptic current peaks were generated. The second voltage pulse induced a current peak significantly higher than the first, successfully replicating the PPF behavior observed in biological synapses. The PPF behavior is highly correlated with the coupling-decoupling relaxation times of the single molecule and cations within the transistor. When the relaxation time exceeds the pulse interval, the accumulation of anions around the single molecule triggered by the first pulse cannot fully diffuse back into the bulk solution. These residual anions hinder the coupling of cations with the single molecule and further drive decoupling through the second pulse. Consequently, when the pre-synaptic pulse interval is short, the second current pulse is significantly enhanced.

To evaluate the enhancement effect of the artificial synaptic transistor, a performance metric (PPF index) was defined, as shown in Fig. 2e:

(S1)

where (*G*1) and (*G*2) represent the conductance peaks triggered by the first and second pulses, respectively. The facilitation effect diminishes as the pulse interval increases, as depicted in Fig. 2E. The decline in PPF index over different time intervals exhibits a characteristic bi-exponential decay, which can be fitted using the following bi-exponential decay function:

(S2)

Here, ∆*t* represents the pulse interval, *C*0 is the PPF index constant when the pulse interval approaches infinity, *C*1 and *C*2 are the initial facilitation amplitudes of the two decay phases, and *τ*1 and *τ*2 are the respective relaxation time constants. This bi-exponential decay is consistent with the attenuation behavior of synaptic facilitation observed in biological synapses. Finally, we tested electrical pulses at different frequencies, maintaining the pulse interval at half of the pulse duration. The findings showed that the device demonstrates a better memory effect under higher frequency stimulation.

The calculation method for the forgetting ratio is as follows (Fig. S21 and Table S4): First, the difference between the saturated conductance value and the initial conductance value (Δ*G*1 = *G*sat – *G*base) is used as a baseline to represent the maximum achievable learning capacity. For measurements taken after each learning event at different relaxation times (e.g., 10 ms or 400 ms), the difference between the measured conductance and the initial conductance (Δ*G*ₙ, such as Δ*G*2 = *G*10ms-1 – *G*base) is calculated. The proportion of this difference relative to the baseline Δ*G*₁ reflects the memory retention level. The forgetting ratio is then defined as 1 minus this retention ratio, i.e., 1 – (Δ*G*n/Δ*G*1), which physically represents the degree of memory loss relative to the maximum learning effect. For instance, a low forgetting ratio at 10 ms reflects short-term memory retention, while a higher forgetting ratio at 400 ms illustrates the natural decay of memory over time. This quantification method effectively captures the memory evolution behavior in the dynamic process of “learning-forgetting-relearning.” Building on these results, we performed simulations encompassing paired-pulse facilitation and Pavlovian experiments, and subsequently implemented the device within a Morse code decoder (Figs. S22-25).


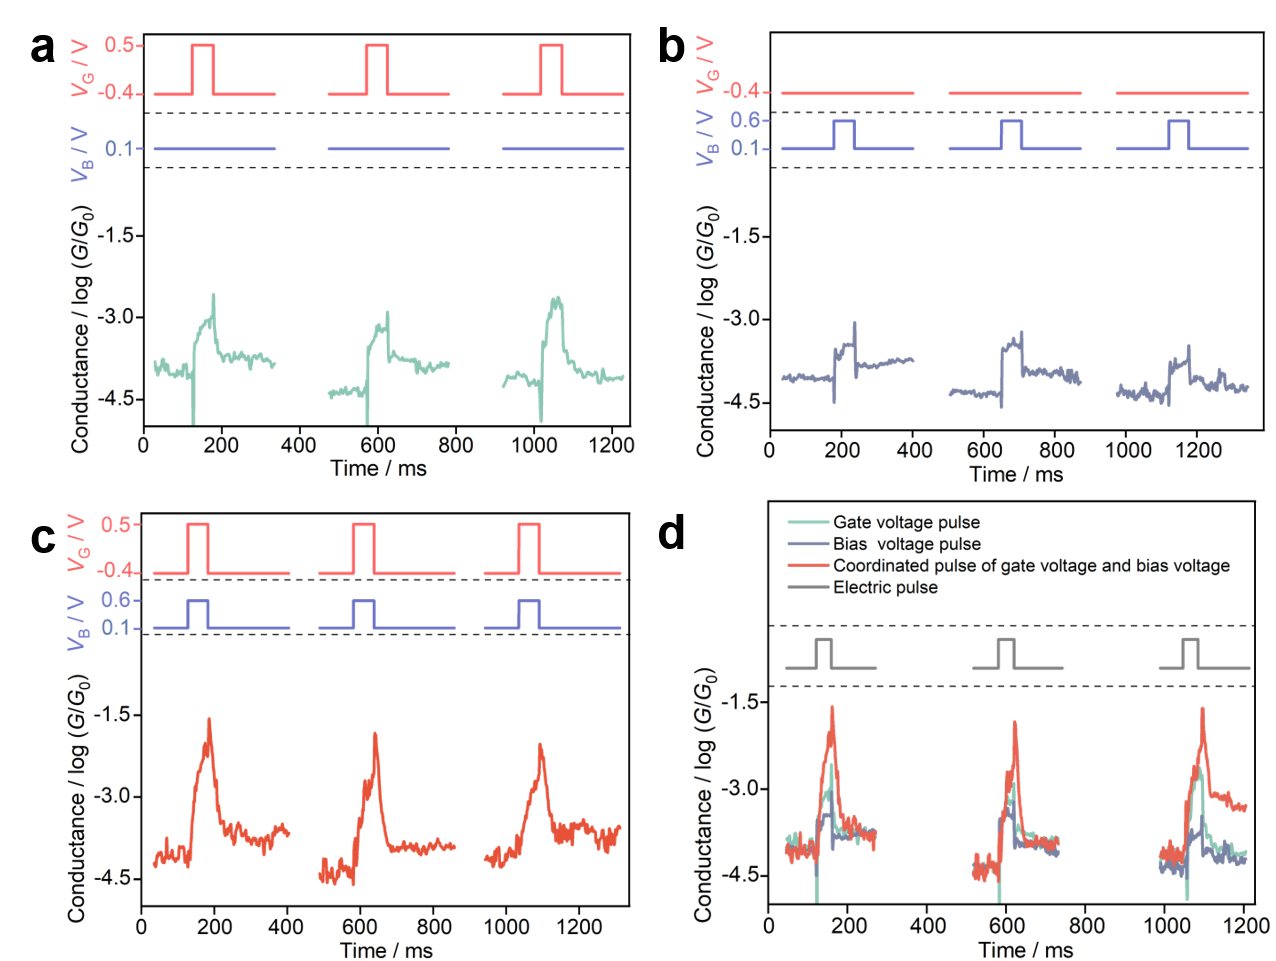


**Fig. S15 Synaptic plasticity simulation of the single-molecule organic electrochemical transistor utilizing** **MeO-TBT with electric pulse stimulation. a,** Synaptic plasticity simulation of the single-molecule organic electrochemical transistor under a gate voltage pulse (*V*G = 0.5 V), with the readout gate voltage set to -0.4 V. **b,** Synaptic plasticity simulation of the single-molecule organic electrochemical transistor with a bias voltage pulse (*V*B = 0.6 V), with the readout bias voltage set to 0.1 V. **c,** Synaptic plasticity simulation of the single-molecule organic electrochemical transistor under combined stimulation of gate voltage (*V*G = 0.5 V) and bias voltage pulses (*V*B = 0.6 V), with the readout gate voltage set to –0.4 V and the readout bias voltage set to 0.1 V. **d,** Comparison of synaptic plasticity simulation under gate voltage pulse, bias voltage pulse, and synergistic stimulation of both gate and bias voltage pulses.

**Table S2 Input signal mode vs. conductance response relationship**

| **Input signal pattern** | **Conductance / nS** | **Superposition comparison / nS** |
| --- | --- | --- |
| Gate voltage | 81.15 | 109.94 |
| Bias voltage | 28.79 |
| Synergistic input of gate voltage and bias voltage | 706.81 | 706.81 |





**Fig. S16 EPSC response under synergistic stimulation of a gate voltage pulse and a bias voltage pulse.** The output signal presents the conductance-time curves resulting from the combined stimulation of gate voltage pulses and bias voltage pulses (123 traces), and the black curve is the fitting curve of these traces (depicted in the inset) (1 *G*0 = 77500 nS). The red curve is the curve of the black curve. The change in conductance follows a bi-exponential function relationship:

(S15)

in this formula,*τ*5 = 215.20 ms, *τ*6 = 2428.26 ms.





**Fig. S17 Mimicking excitatory post-synaptic conductance under different pulse durations utilizing the single-molecule organic electrochemical transistor under combined stimulation of gate voltage (*V*G = 0.5 V) and bias voltage pulses (*V*B = 0.6 V).**


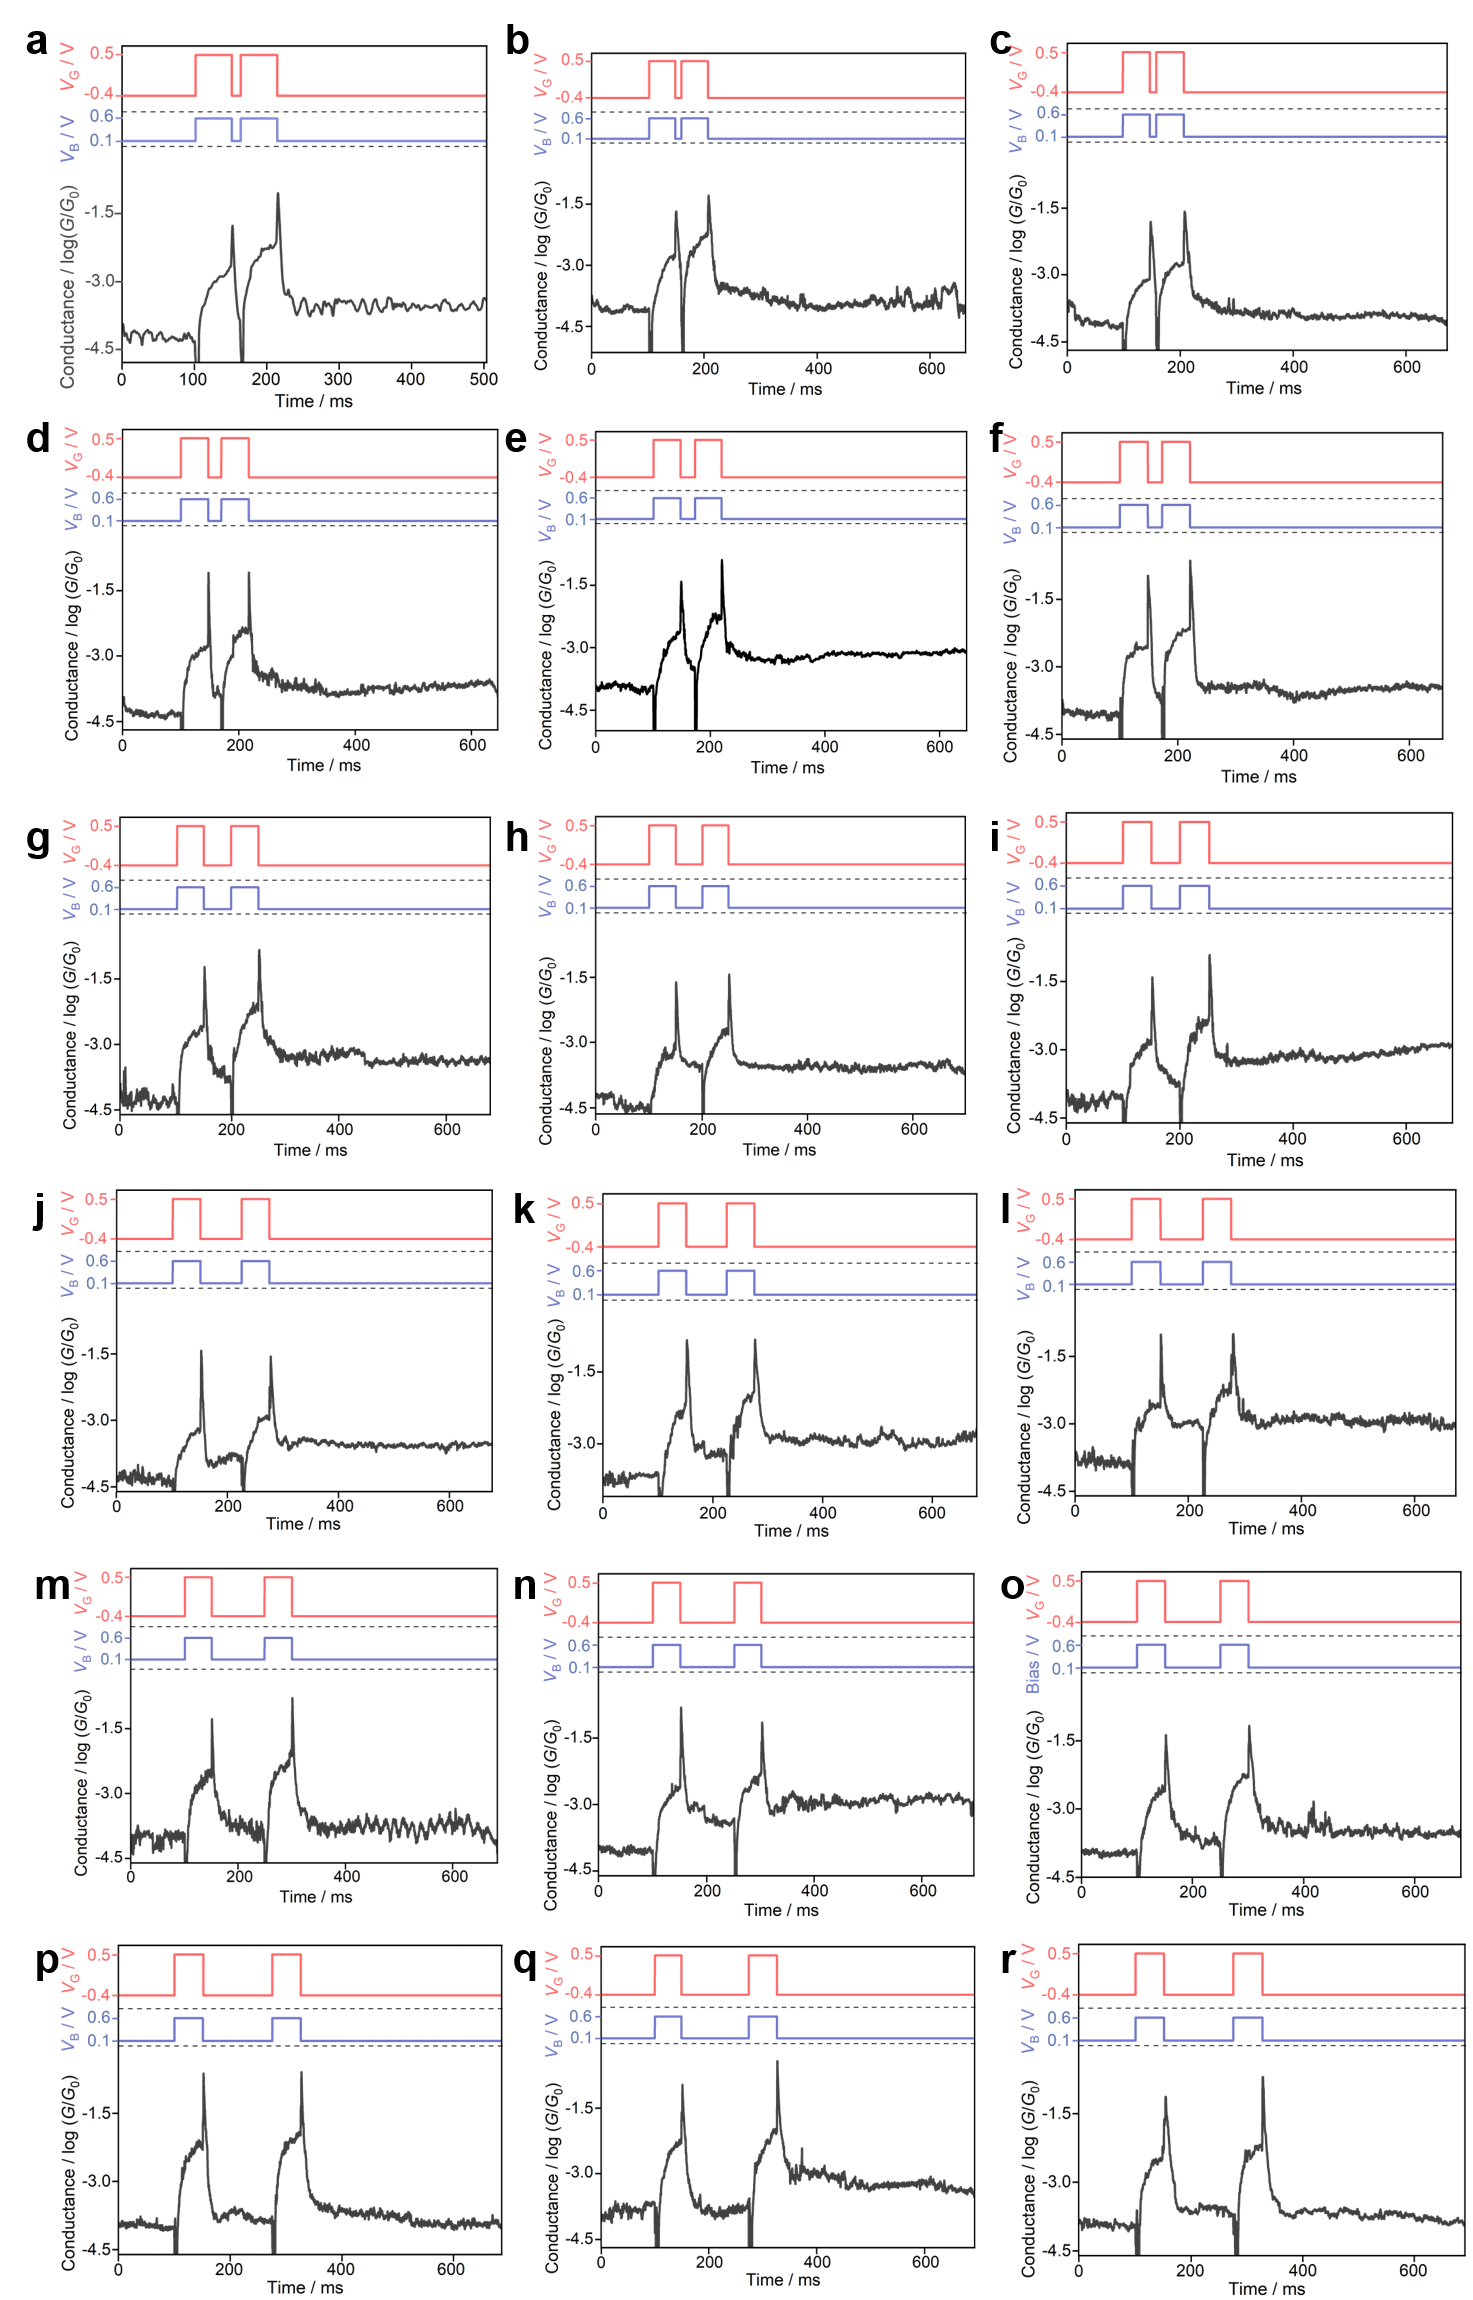


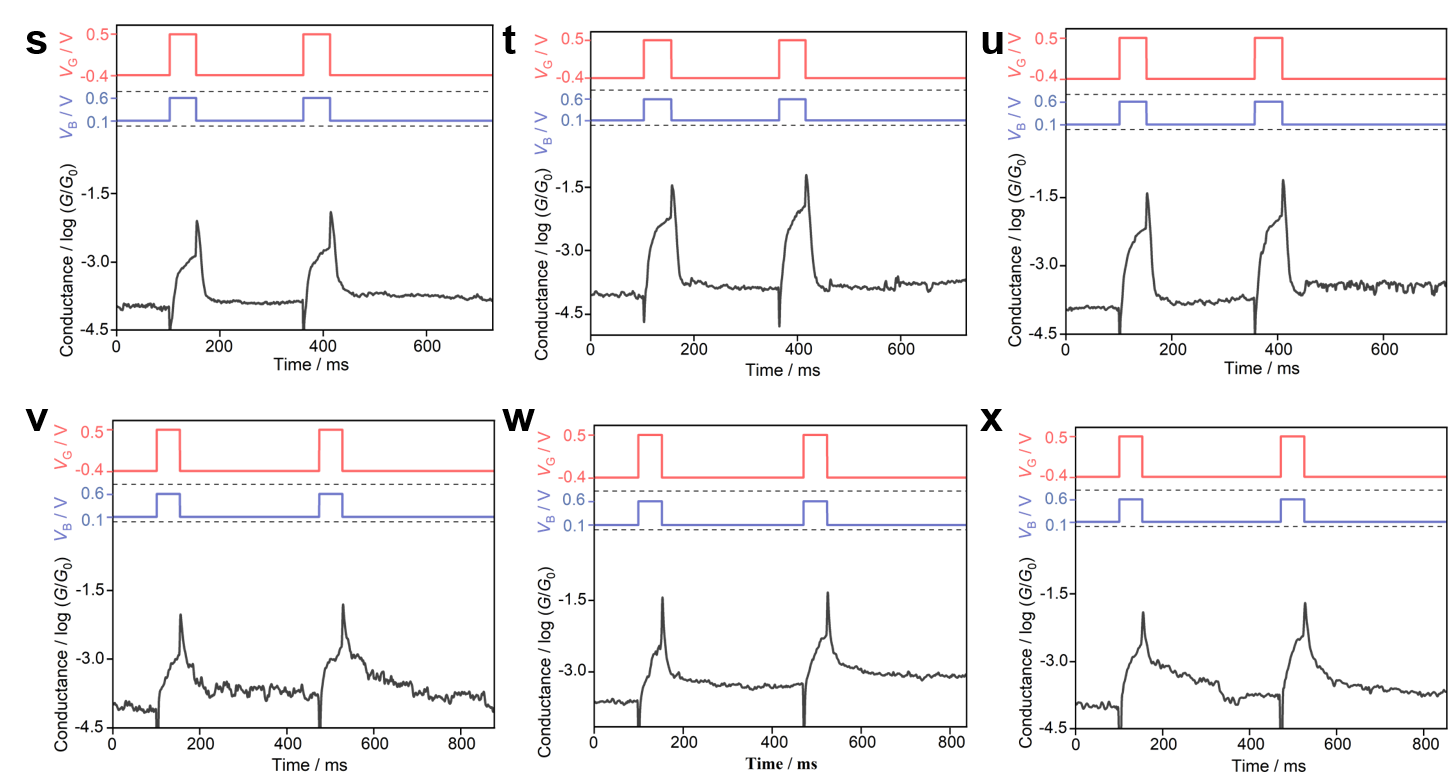


**Fig. S18 Paired-pulse facilitation simulation of the single-molecule organic electrochemical transistor under combined stimulation of *V*G = 0.5 V and *V*B = 0.6 V with various ∆*t* ranging from 10 ms to 300 ms utilizing MeO-TBT**, **with the readout gate voltage set to -0.4 V and the readout bias voltage set to 0.1 V. a, b, c,** Paired-pulse facilitation simulation with*t*p = 50 ms and ∆*t* = 10 ms. **d, e, f,** Paired-pulse facilitation simulation with *t*p = 50 ms and ∆*t* = 25 ms. **g, h, i,** Paired-pulse facilitation simulation with *t*p = 50 ms and ∆*t* = 50 ms. **j, k, l,** Paired-pulse facilitation simulation with *t*p = 50 ms and ∆*t* = 75 ms. **m, n, o,** Paired-pulse facilitation simulation with *t*p = 50 ms and ∆*t* = 100 ms. **p, q, r,** Paired-pulse facilitation simulation with *t*p = 50 ms and ∆*t* = 125 ms. **s, t, u,** Paired-pulse facilitation simulation with *t*p = 50 ms and ∆*t* = 200 ms. **v, w, x,** Paired-pulse facilitation simulation with *t*p = 50 ms and ∆*t* = 300 ms.





**Fig. S19 Synaptic plasticity simulation of the single-molecule organic electrochemical transistor under different pulse frequencies with combined stimulation of presynaptic gate voltage (*V*G = 0.5 V) and bias voltage pulses (*V*B = 0.6 V) utilizing MeO-TBT.** The bright orange line signifies that the device mimics synaptic plasticity under pulse durations (*t*p = 50 ms) and various pulse intervals (∆*t* = 25 ms).The dark orange line signifies that the device mimics synaptic plasticity under *t*p = 100 ms and ∆*t* = 50 ms.





**Fig. S20** **Statistical analysis of multi-pulse-induced conductance states in single-molecule devices (Supporting to Main Text Fig. 2f).**

**Table S3 Steady-state conductance values and inter-state differences under pulse modulation (Supporting to right panel of Fig. 2f)**

| **Conductance state order** | **Conductance value / nS** | **Conductance change / nS** |
| --- | --- | --- |
| 1 | 4.77 | - |
| 2 | 7.93 | 3.16 |
| 3 | 12.28 | 4.35 |
| 4 | 20.86 | 8.58 |
| 5 | 30.85 | 9.99 |
| 6 | 69.07 | 38.22 |
| 7 | 64.46 | -4.61 |
| 8 | 199.21 | 134.75 |
| 9 | 406.73 | 207.52 |
| 10 | 536.17 | 129.44 |
| 11 | 1378.17 | 842.0 |


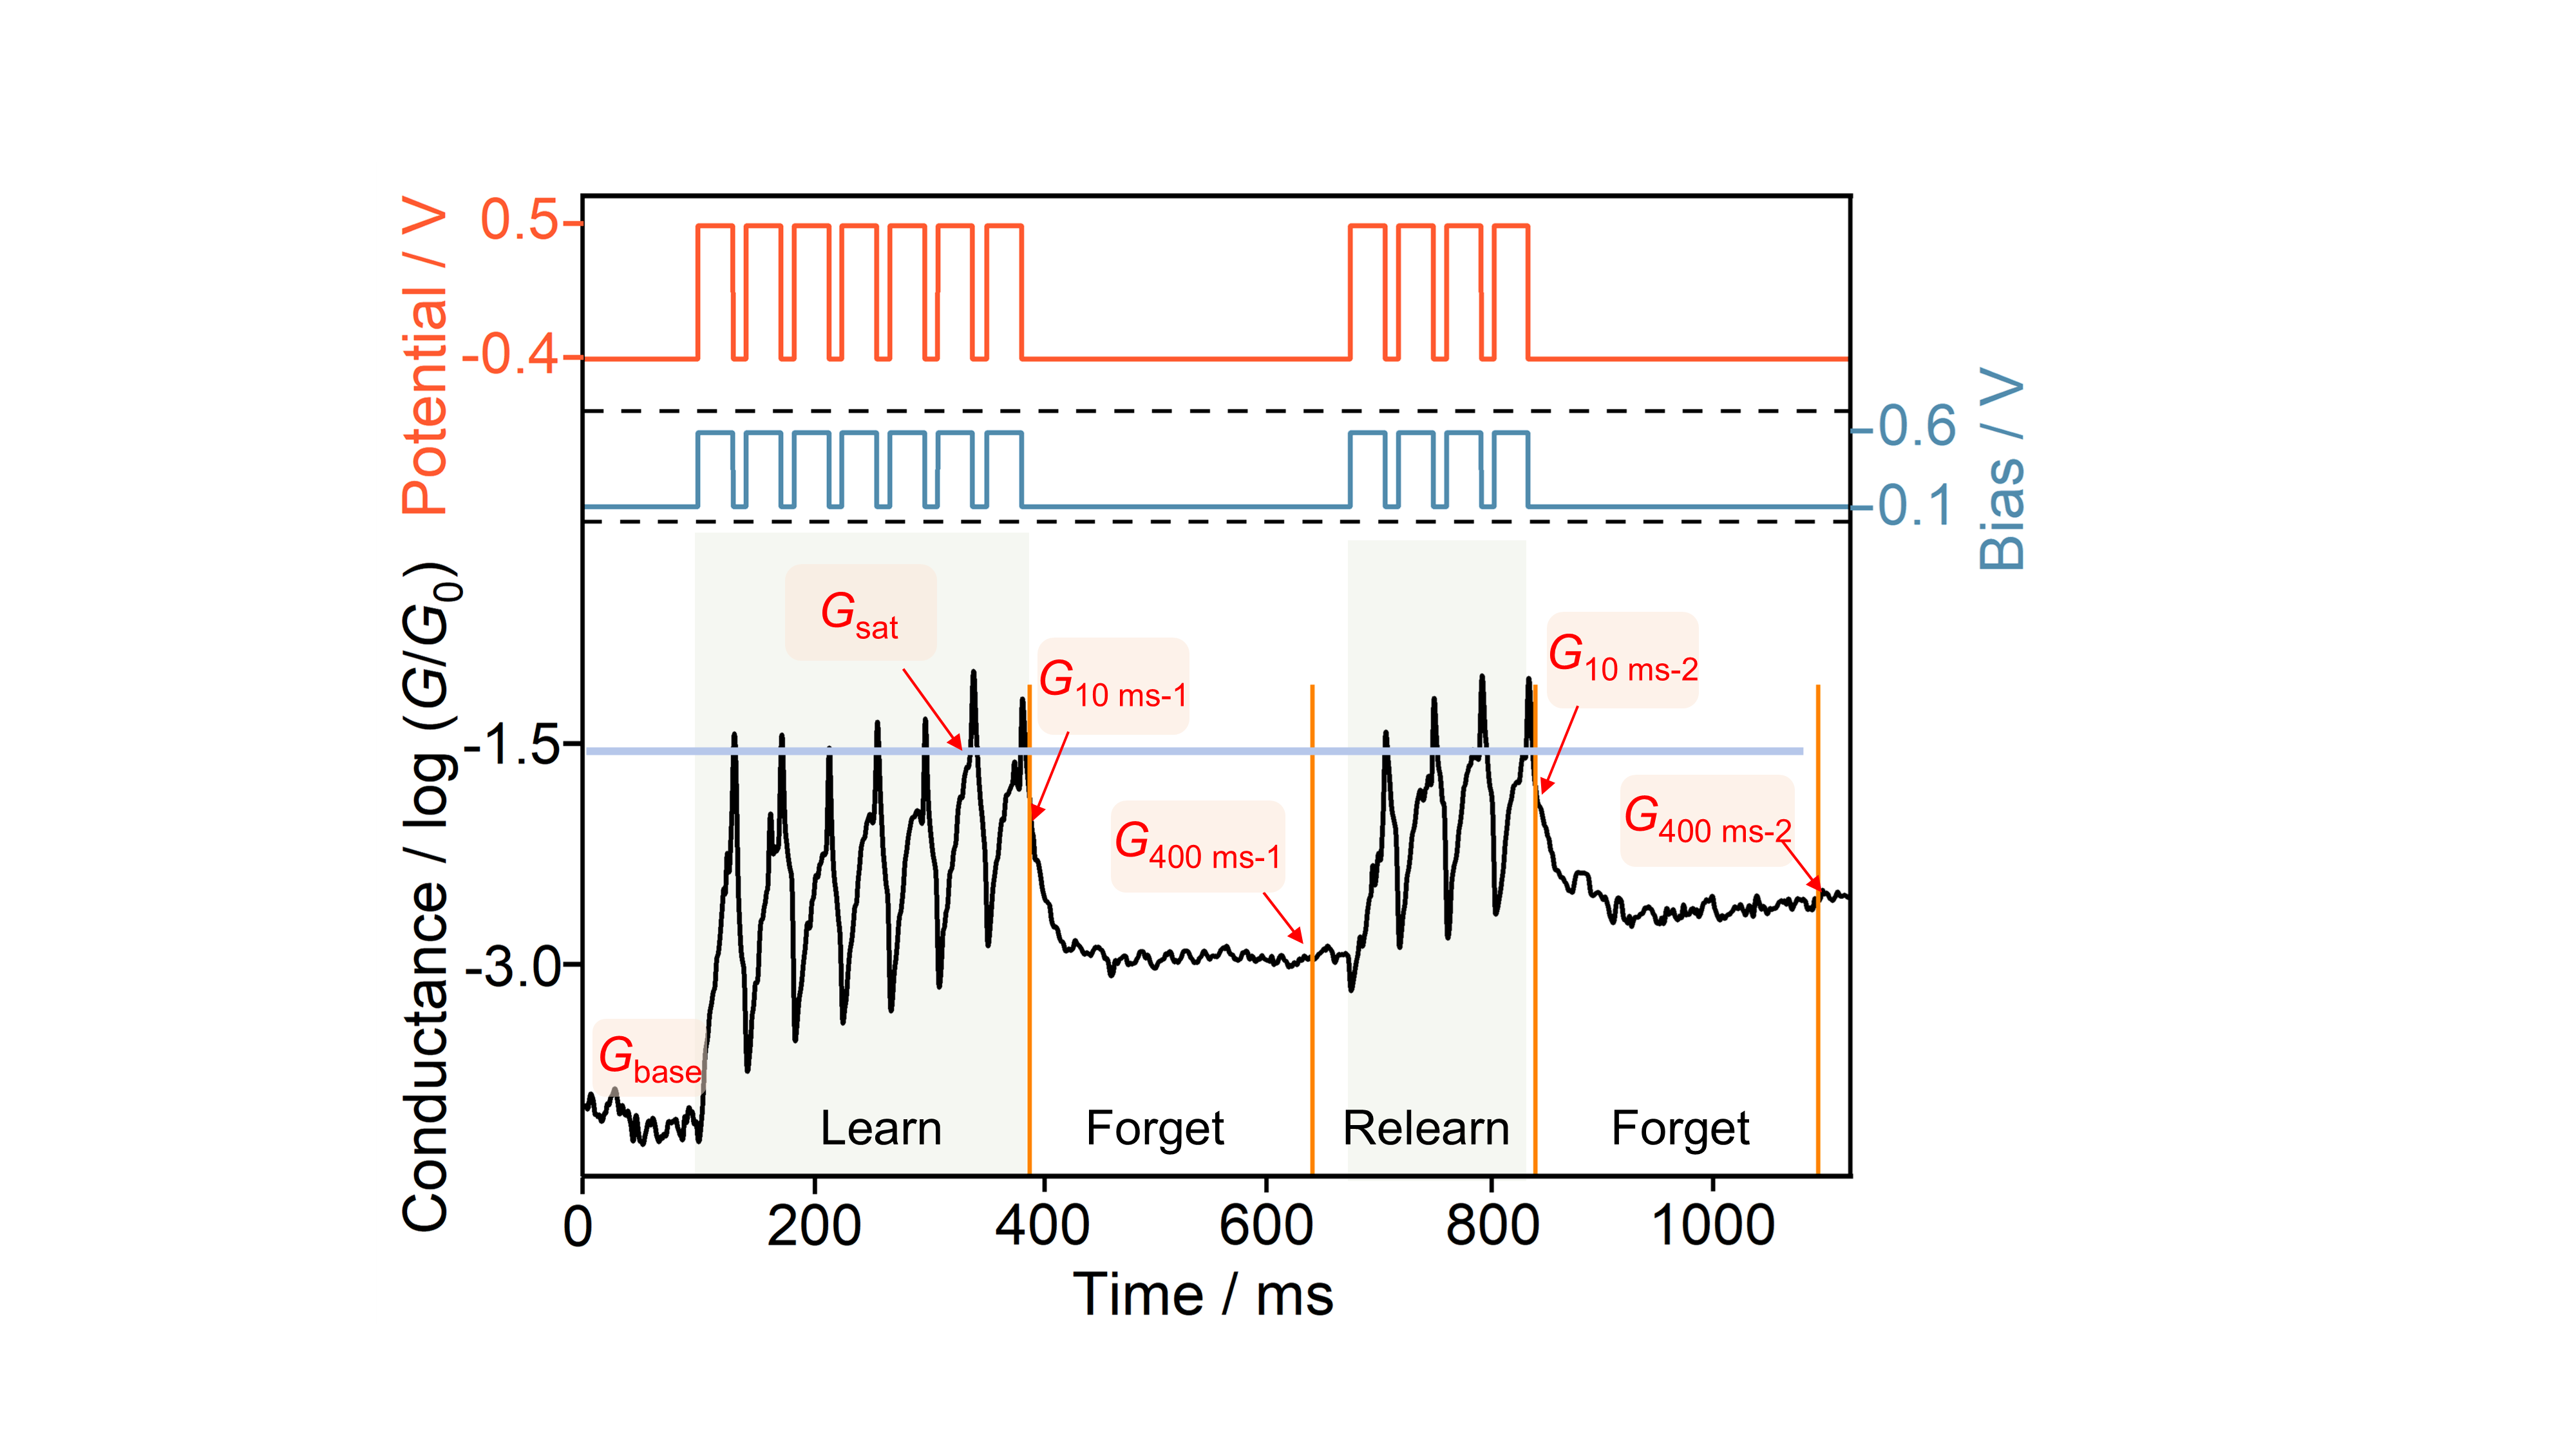


**Fig. S21 The device emulates “learning-forgetting-relearning” plasticity under combined stimulation of gate voltage pulses and bias voltage pulses (*V*G = 0.5 V, *V*B = 0.6 V, *t*p= 50 ms, ∆*t* = 10 ms).**

**Table S4 Analysis of conductance dynamics and forgetting ratio in “learning-forgetting-relearning” paradigm**

| **Conductance / nS** | **Difference from initial conductance (Δ*G*) / nS** | **Forgetting Ratio (%)** |
| --- | --- | --- |
| *G*base = 6.59 | - | - |
| *G*sat = 2184.25 | Δ*G*1 = 2176.32 | - |
| *G*10 ms-1 = 466.98 | Δ*G*2 = 460.39 | 78.85 |
| *G*400 ms-1 = 97.57 | Δ*G*3 = 90.98 | 95.82 |
| *G*10 ms-2 = 998.39 | Δ*G*4 = 991.80 | 54.43 |
| *G*400 ms-2 = 173.50 | Δ*G*5 = 173.50 | 92.39 |


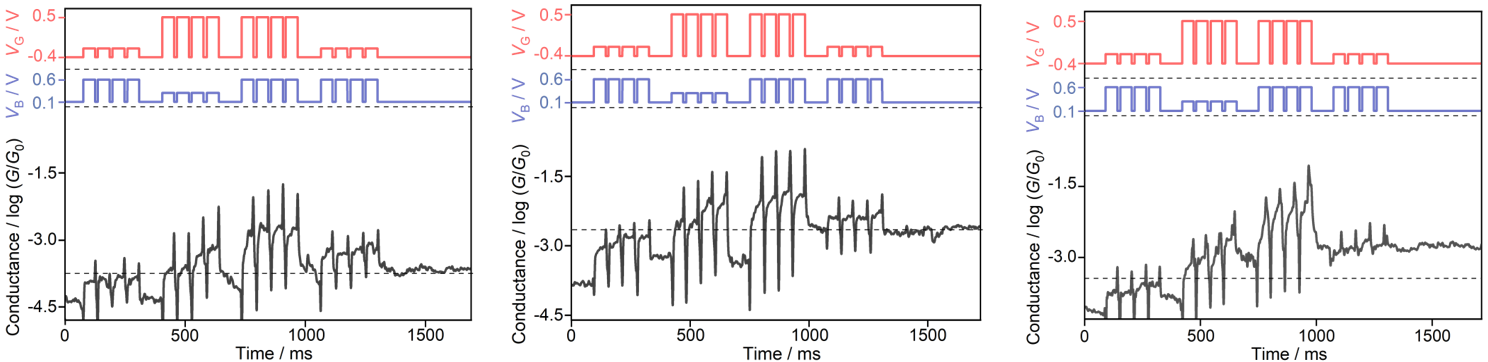


**Fig. S22 Three implementations of Pavlov's experiment in single-molecule devices via gate-bias voltage pulses.** The readout gate voltage of the device was set to –0.4 V, and the readout bias voltage to 0.1 V. Initially, four repeated stimulations combining gate voltage and bias voltage pulses (*V*G = –0.2 V, *V*B = 0.6 V, *t*p = 50 ms, ∆*t* = 10 ms) were applied to mimic the scenario of a dog hearing a bell (Conditioned Stimulus, CS). Subsequently, after an interval of ∆*t* = 100 ms, another set of four repeated pulses (*V*G = 0.5 V, *V*B = 0.3 V, *t*p = 50 ms, ∆*t* = 10 ms) was applied to simulate the scenario of a dog seeing food (Unconditioned Stimulus, UCS). Next, following a 100 ms interval, four further repeated pulses (*V*G = 0.5 V, *V*B = 0.6 V, *t*p = 50 ms, ∆*t* = 10 ms) were administered to represent the dog simultaneously hearing the bell and seeing food (combined CS and UCS). Finally, after another 100 ms interval, four conditioning pulses (*V*G = –0.2 V, *V*B = 0.6 V, *t*p= 50 ms, ∆*t* = 10 ms) were reapplied to recapitulate the bell stimulus in Pavlovian conditioning, achieving biomimetic emulation of associative learning behavior.


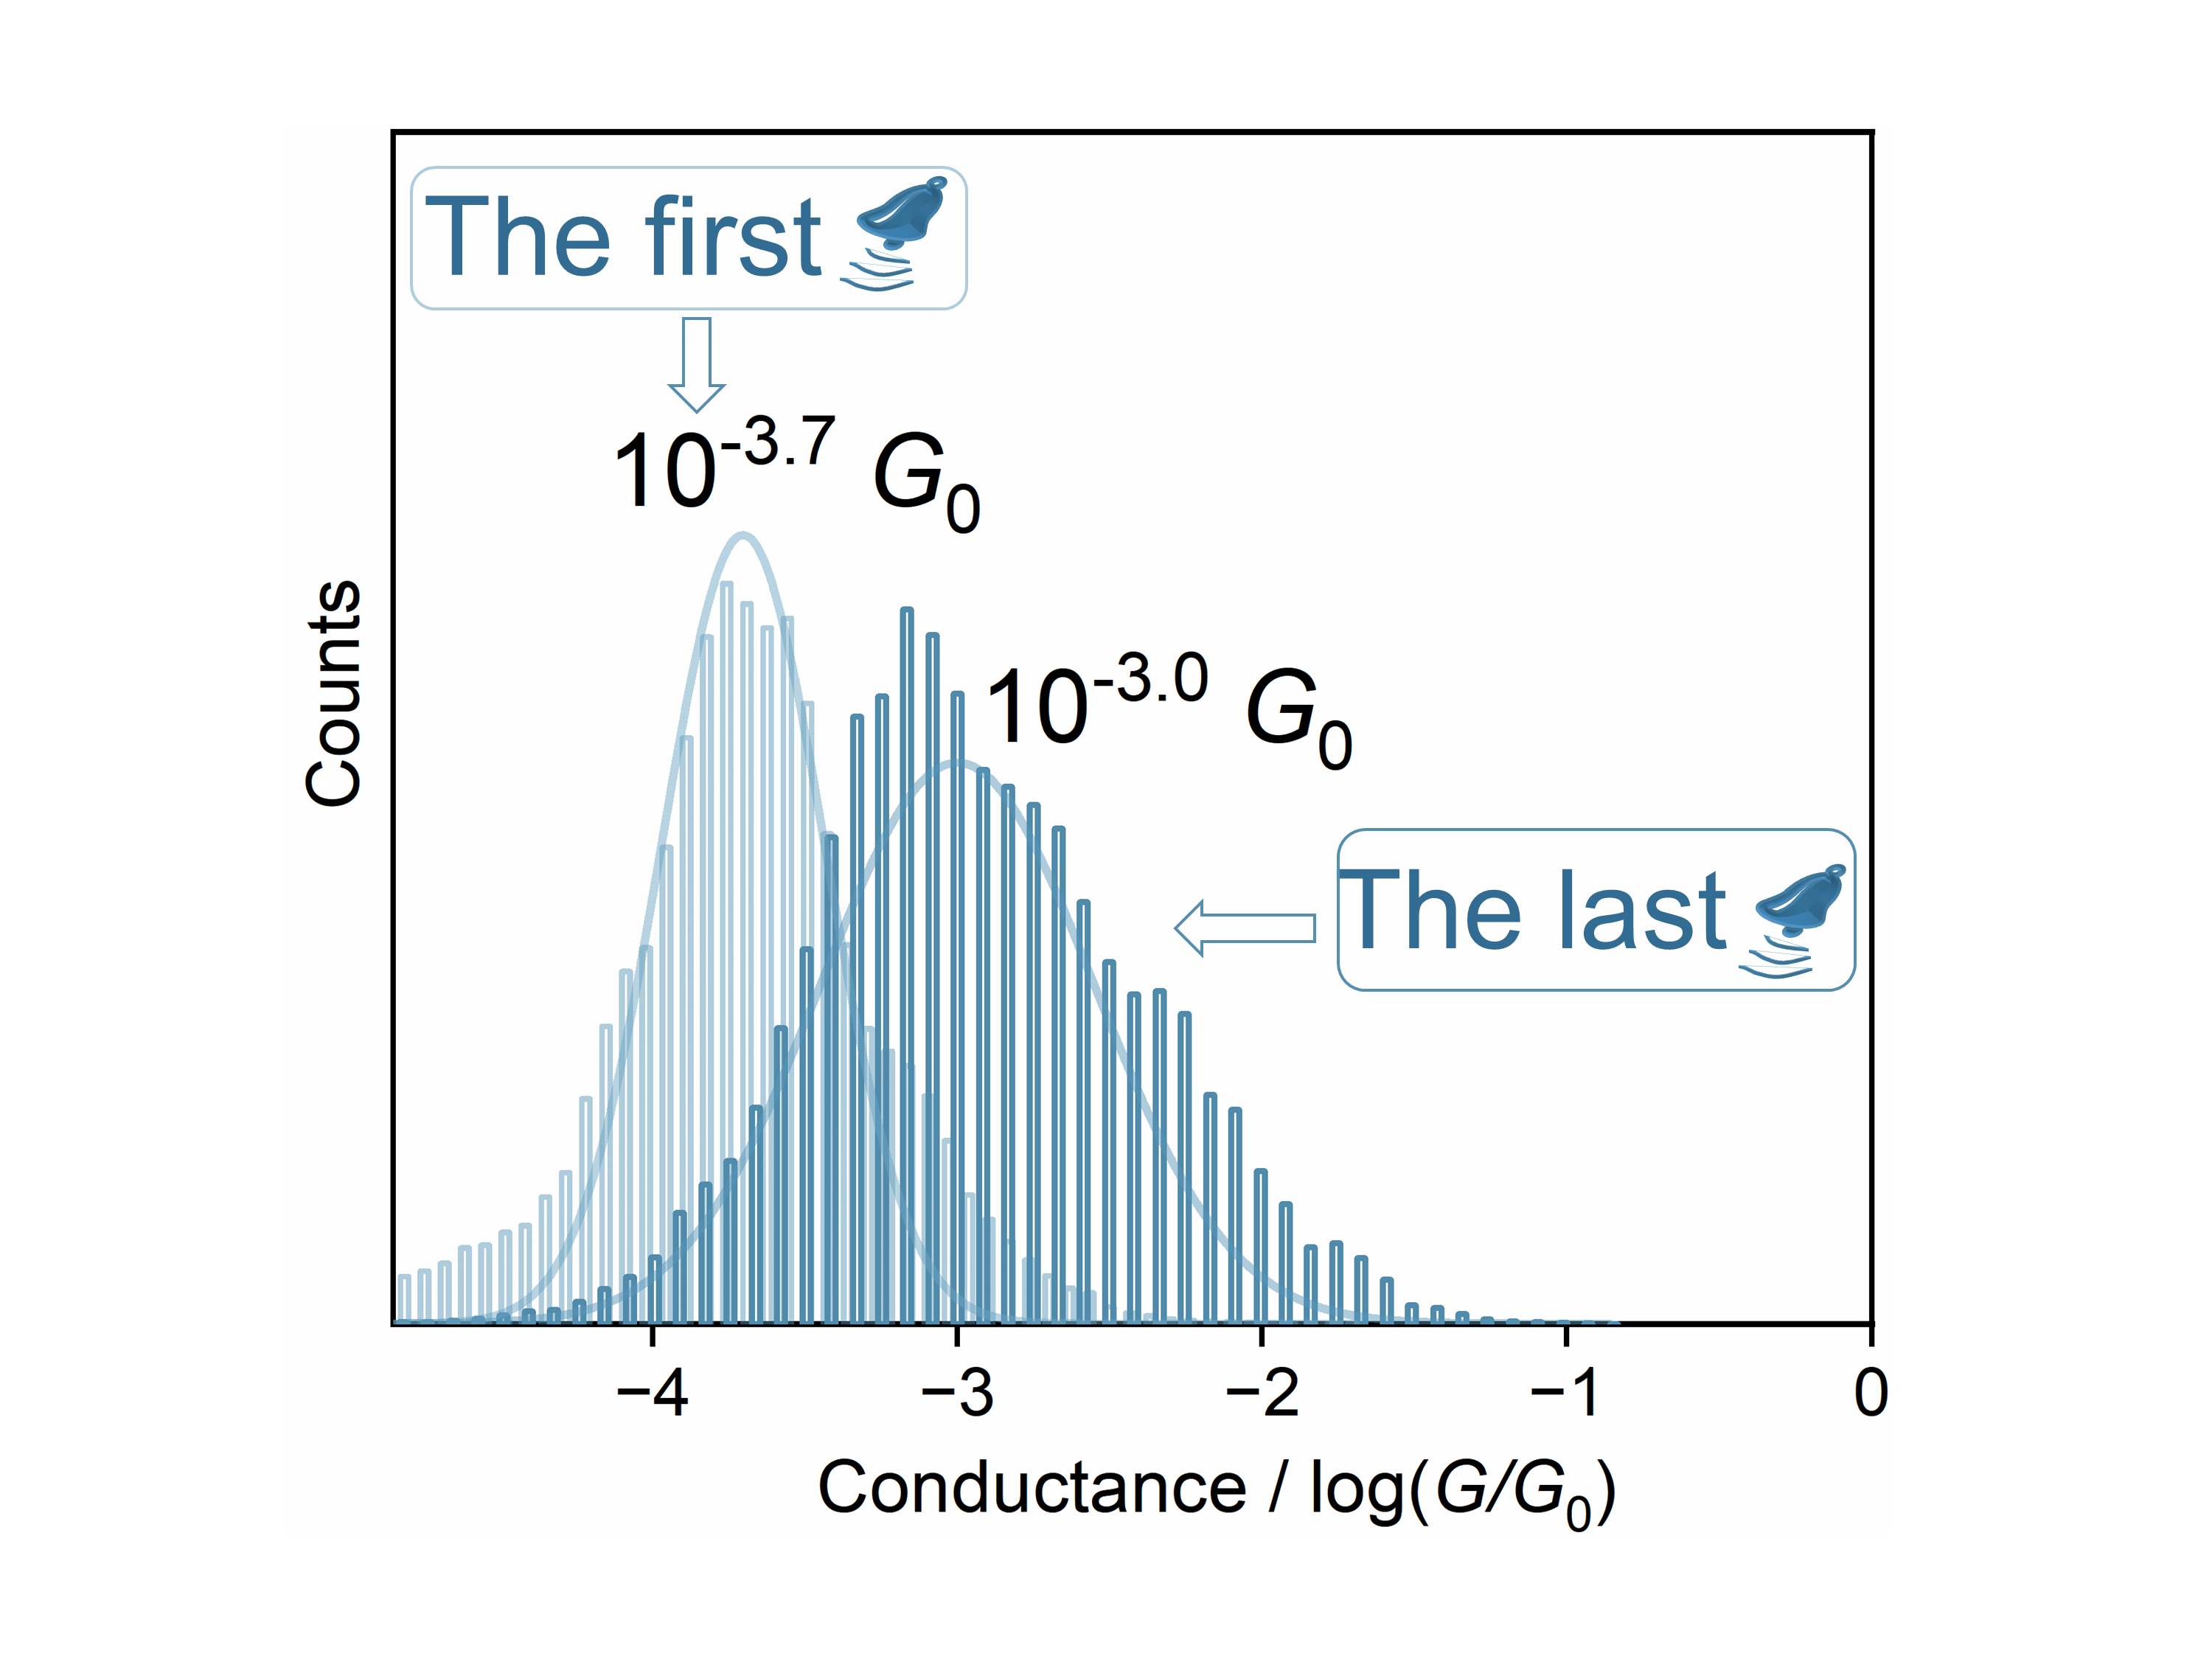


**Fig. S23 Comparative statistics of conductance values before and after Pavlovian conditioning in single-molecule devices (Supporting to the right panel of Fig. 3b).**





**Fig. S24 Application of the single-molecule organic electrochemical transistor lies in Morse code decoding under combined stimulation of presynaptic gate voltage (*V*G = 0.5 V) and bias voltage pulses (*V*B = 0.6 V) utilizing MEO-TBT, with the readout gate voltage set to –0.4 V and the readout bias voltage set to 0.1 V. An output curve under pulse duration of *t*p = 25 ms represents “.”, while an output curve under pulse duration of *t*p = 75 ms represents “-”.**





**Fig. S25 Statistics of steady-state conductance values after termination of different Morse code pulse sequences (Supporting to the right panel of Fig. 3c).**


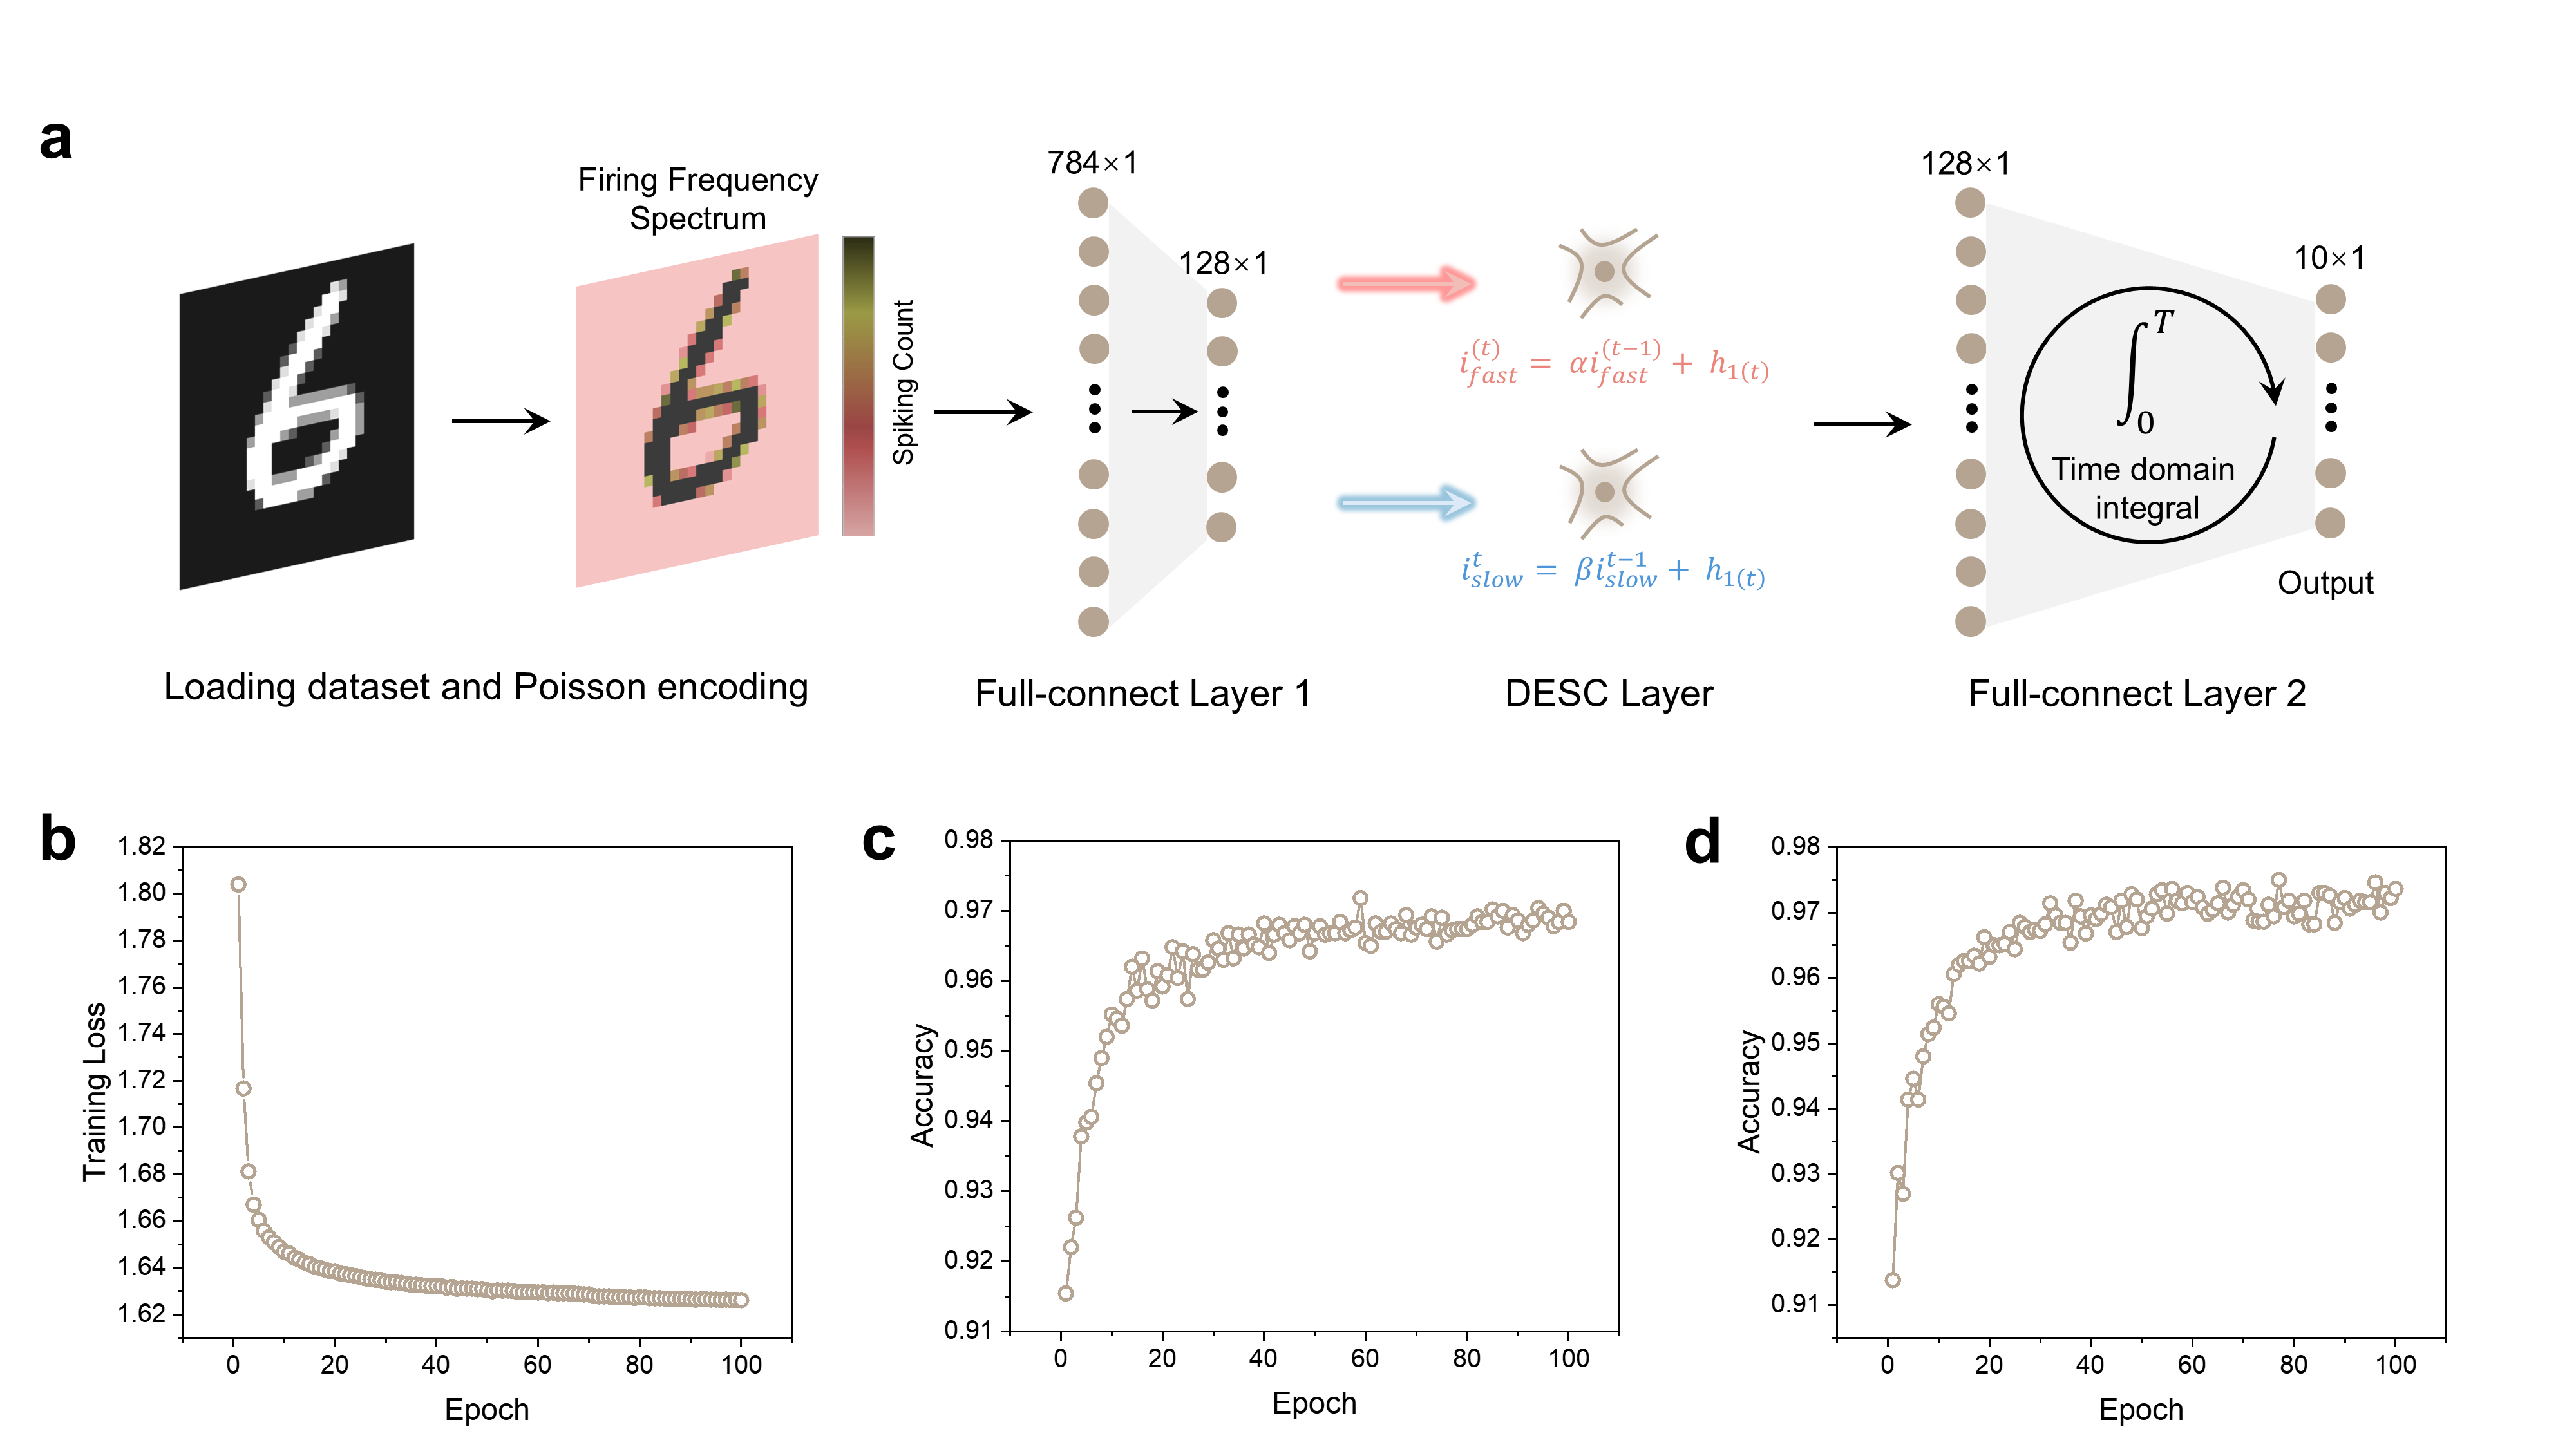


**Fig. S26 Network architecture and learning dynamics of the dual-exponential spiking neural network.** **a,** Biologically interpretable hierarchical processing architecture: The input layer (28 × 28 pixels) employs Poisson temporal encoding to generate spike trains. The dual-exponential synaptic conductance pathways implement dimensional reduction through two synaptic layers (784→128→10 units) with antagonistic integration dynamics. **b,** Training loss trajectory shows cross-entropy minimization via spatio-temporal backpropagation (BPTT), converging to a final *L*train = 1.626. **c,** Validation accuracy progression reaches 97.4% peak performance. **d,** Test set evaluation demonstrates 96.9% classification accuracy with a 0.5% generalization gap.

**S4. Mechanism of neuromorphic devices constructed with a single molecule as the component**


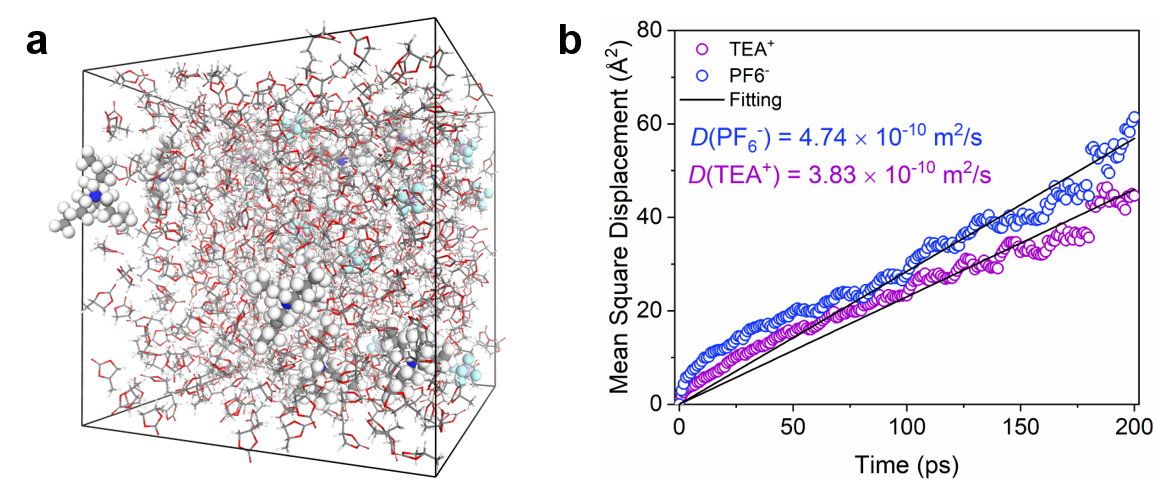


**Fig. S27 Large scale force-field molecular dynamic (FFMD) simulations were carried to investigate the ionic migration of TEA+ and PF6**⁻ **driven by the external electric field. a**, The box contained with PC, 0.2M TEA+ and 0.2 M PF6⁻ for the equilibrium MD simulations. **b**, The relation between mean square displacement and simulated time of TEA+ and 0.2 M PF6⁻ obtained from equilibrium molecular dynamic simulations.


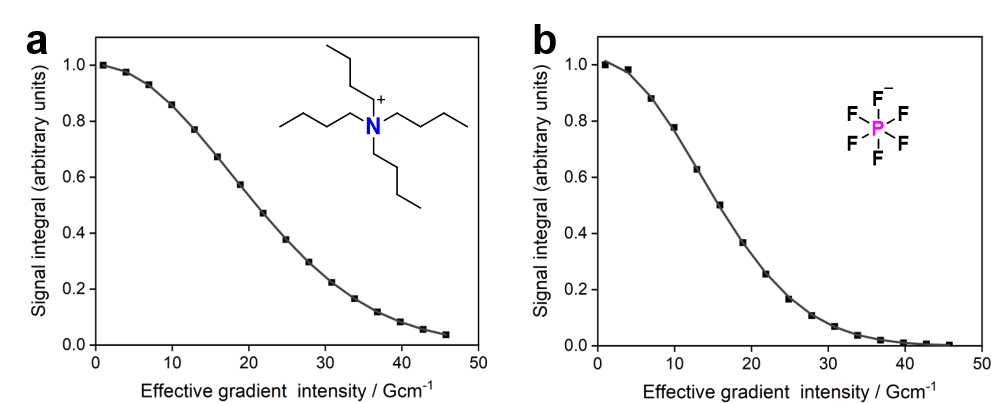


**Fig. S28 Comparison of diffusion coefficients between** **tetrabutylammonium cation and** **hexafluorophosphate anion.** **The diffusion coefficient is ascertained through fitting to the equation, wherein *I* = *I*0*exp(-*D**SQR(2*π**γ***G*i**L*D)*(*B*D-*L*D/3)*1e4). a,** Decay of the integrated signal of the tetrabutylammonium cation asa function of the amplitude of the encoding and decoding gradients. The diffusion coefficient is *D* = 3.048 × 10-10 m2/s. **b,** Decay of the integrated signal of the hexafluorophosphate anion asa function of the amplitude of the encoding and decoding gradients. The diffusion coefficient is *D* = 4.850 × 10-10 m2/s.


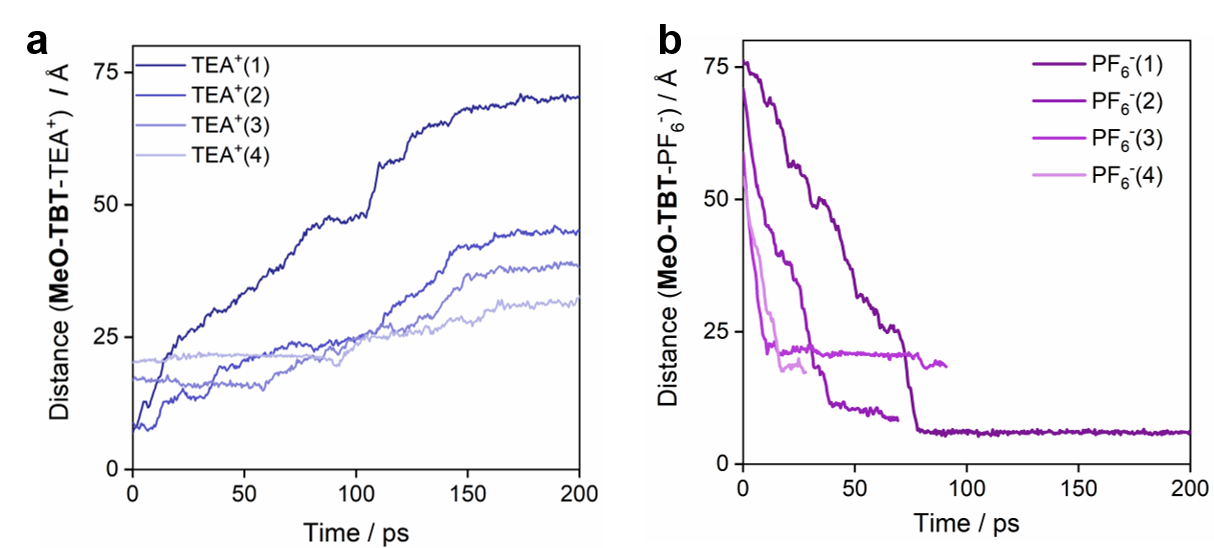


**Fig. S29** **In large-scale force-field molecular dynamics (FFMD) simulations, we investigated the dynamic process of the distance variation between MeO-TBT and ions over time, driven by an external electric field. a**, The time-evolved profiles of distance between TEA+ and **MeO-TBT**. **b,** The time-evolved profiles of distance between PF6⁻ and **MeO-TBT**.


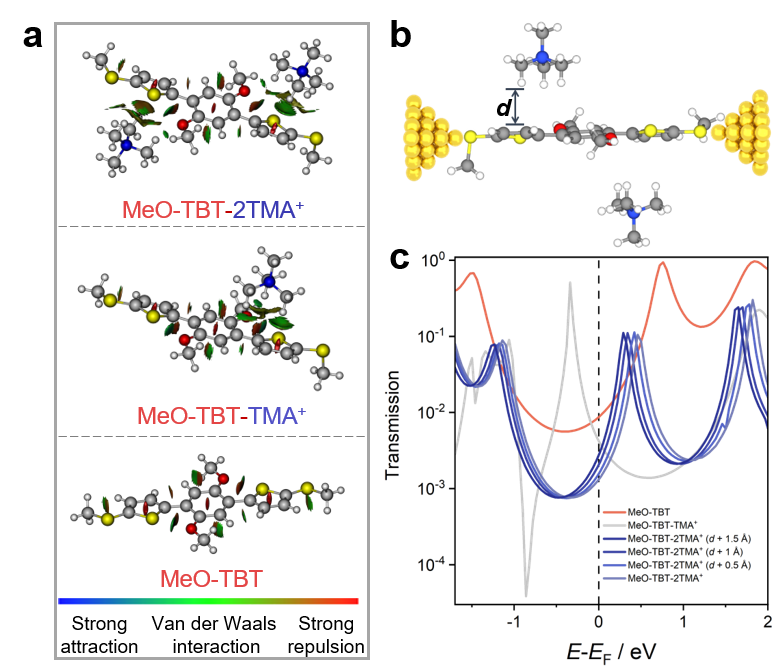


**Fig. S30 Mechanism analysis of single-molecule synaptic devices.** **a,** Models representing the interaction of **MeO-TBT** with one and two cations. **b,** Structure of **MeO-TBT** molecular junctions under negative potential. **c,** Transmission spectra calculations of single-molecule junctions for **MeO-TBT**, **MeO-TBT-TEA+**, **MeO-TBT-2TEA+ (*d*+ 1.5 Å), MeO-TBT-2TEA+ (*d*+ 1 Å)**, **MeO-TBT-2TEA+ (*d*+ 0.5 Å)**, **MeO-TBT-2TEA+**. The distance between **MeO-TBT** and one of the TEA+ ions is denoted as *d* = 2.41 Å.


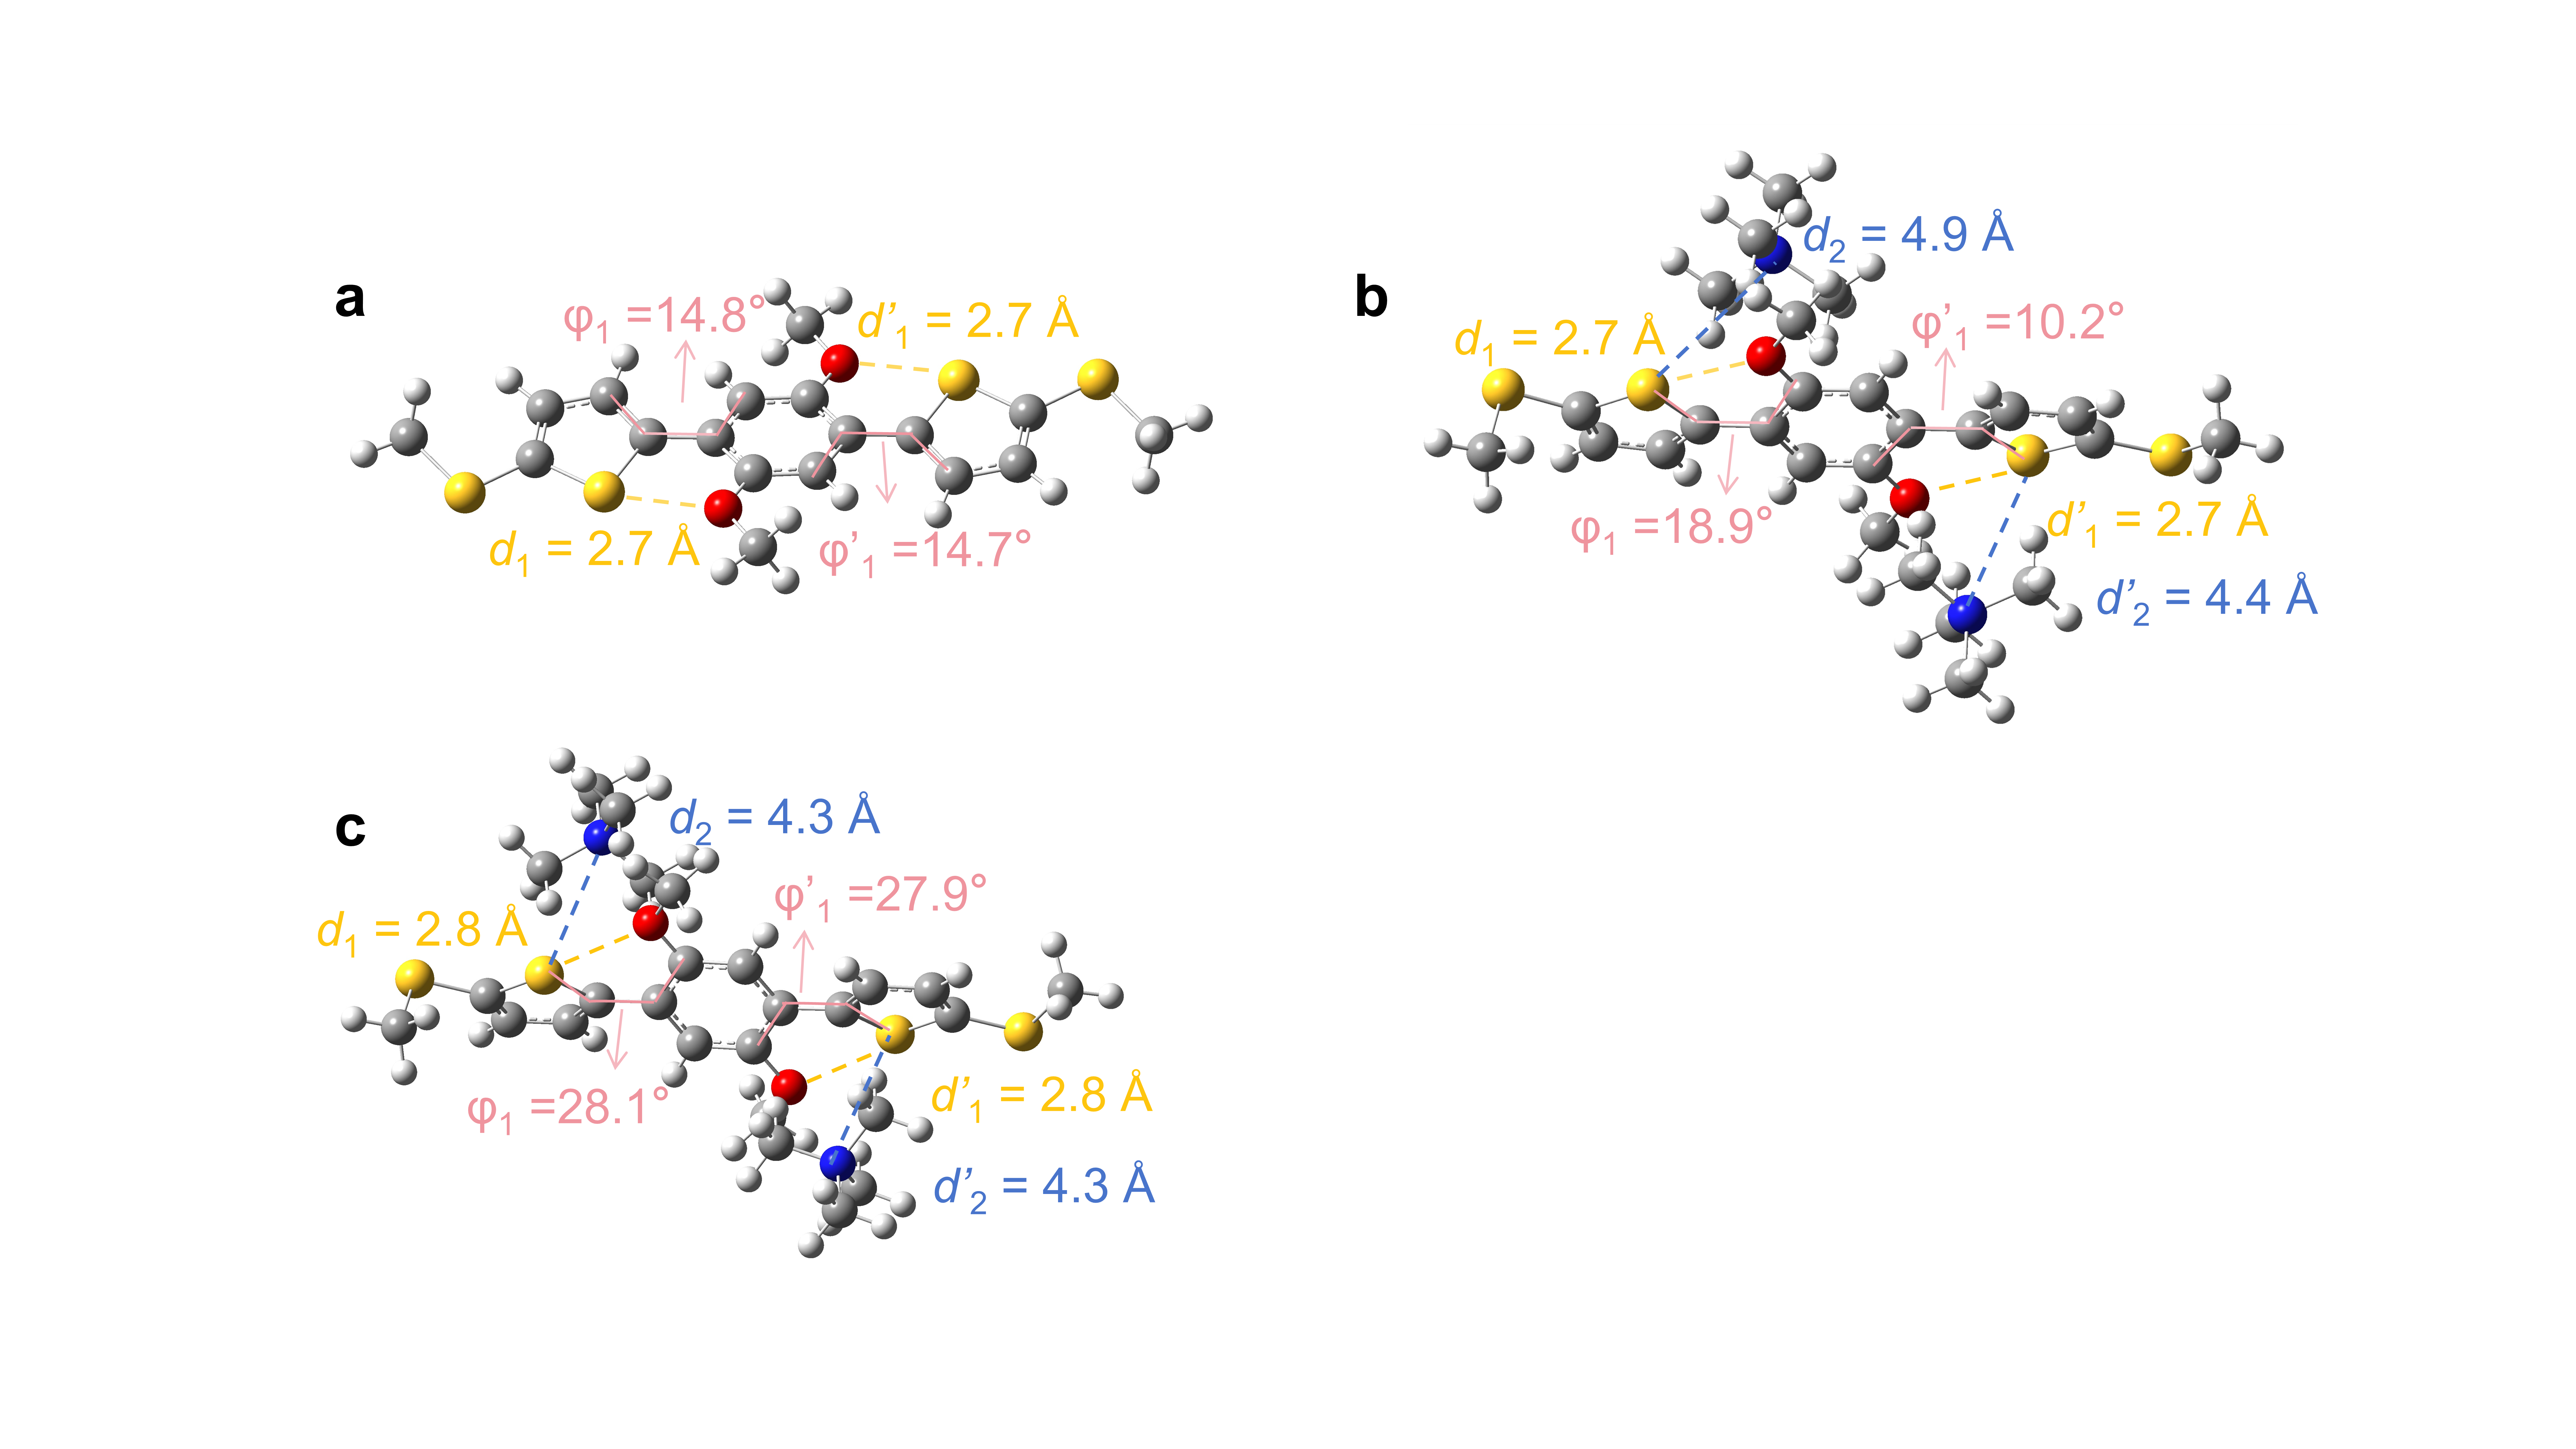


**Fig. S31** **Electric-field-induced ion migration and conformational changes of MeO-TBT. a**, Initial configuration, showing the dihedral angle and O–S distance. **b**, Configuration under weak ion-molecule interaction, showing the altered dihedral angle and O–S distance. **c**, Configuration under strong ion-molecule interaction, with a reduced ion-molecule distance and further changes in the dihedral angle and O–S distance.

**Comparative experiments:** Based on theoretical and experimental research, we propose that the working mechanism of the single-molecule synaptic transistor arises from the electrostatic coupling and decoupling between **MeO-TBT** and cations in the electrolyte. To validate this proposed mechanism, we conducted a control experiment using **Et-TBT**, which lack intramolecular non-covalent S-O interactions, to construct the transistor. We tested the *I*-*V*G and *I*-*V*B curves of the device (Figs. S32 and S33). The results showed that under the same test conditions, the transistor constructed with **Et-TBT** exhibited less *I*-*V*G hysteresis compared to the constructed with **MeO-TBT**, and the *I*-*V*G curves showed no significant hysteresis. We also measured the forward and reverse sweep curves of *I*-*V*G and *I*-*V*B for tetrabutylammonium hexafluorophosphate (TBAPF6), tetrabutylammonium tetrafluoroborate (TBABF4), tetraethyl ammonium hexafluorophosphate (TEAPF6), and lithium bis(trifluoromethanesulfonyl)imide (LiTFSI). Devices based on ammonium cations exhibited pronounced hysteresis in both *I*-*V*G and *I*-*V*B curves, whereas devices without ammonium ions showed a smaller *I*-*V*G hysteresis area and nearly no *I*-*V*B hysteresis (Figs. S34-36). This further confirms the crucial role of ammonium ions in the generation of memory functions in the devices.

To compare the migration rates of different cations in propylene carbonate, we conducted conductivity tests (Table S5). It can be observed that the conductivity of TEAPF6 is higher than that of TBAPF6. Since their anions are the same, we can infer that the cation in TEAPF6 has a higher migration rate in PC compared to the cation in TBAPF6. On the other hand, TBABF4 exhibits a higher conductivity than TBAPF6. Given that their cations are the same, we conclude that the anion in TBABF4 has a higher migration rate than the anion in TBAPF6. The experimental results demonstrate that the tetrabutylammonium ion (TBA+) exhibits lower mobility in propylene carbonate (PC) compared to the tetraethylammonium ion (TEA+). This characteristic leads to a larger *I*-*V*G hysteresis area in TBA+-based devices, indicating that lower cation mobility is beneficial for extending the memory time of the device. Notably, although the hexafluorophosphate ion (PF6⁻) shows higher mobility than the tetrafluoroborate ion (BF4-), devices employing PF6⁻ still maintain a substantial hysteresis area. This observation suggests that anion mobility characteristics have relatively limited influence on the memory functionality of the devices.

The conductivity of the electrolyte solution containing propylene carbonate was measured using the DDS-11A conductivity meter produced by the Shanghai Institute of Scientific Instrumentation, Chinese Academy of Sciences. Before measurements, it is essential to calibrate the electrode constant of the instrument. We used a commercially available 0.01 mol/L potassium chloride solution as the standard conductivity solution, with a conductivity value of 1408 μS/cm. First, the conductivity electrode is thoroughly cleaned with distilled water and then carefully dried with filter paper. Next, the electrode is rinsed with the standard solution before being immersed in the standard solution. The instrument will display the conductivity value, and once the reading stabilizes, the current conductivity value *C*t is recorded. Based on the current ambient temperature (25.0 ℃), the nominal conductivity *C*s of the standard solution at this temperature is referenced. The electrode constant is then calculated as *k* = *C*s/*C*t. Before measuring the conductivity of the target electrolyte, the electrode constant on the instrument is adjusted to *k*. Prior to actual measurements, the electrode should be rinsed with the solution to be tested, followed by immersing the electrode of the conductivity meter into the target solution. After the reading stabilizes, the conductivity value can be recorded.


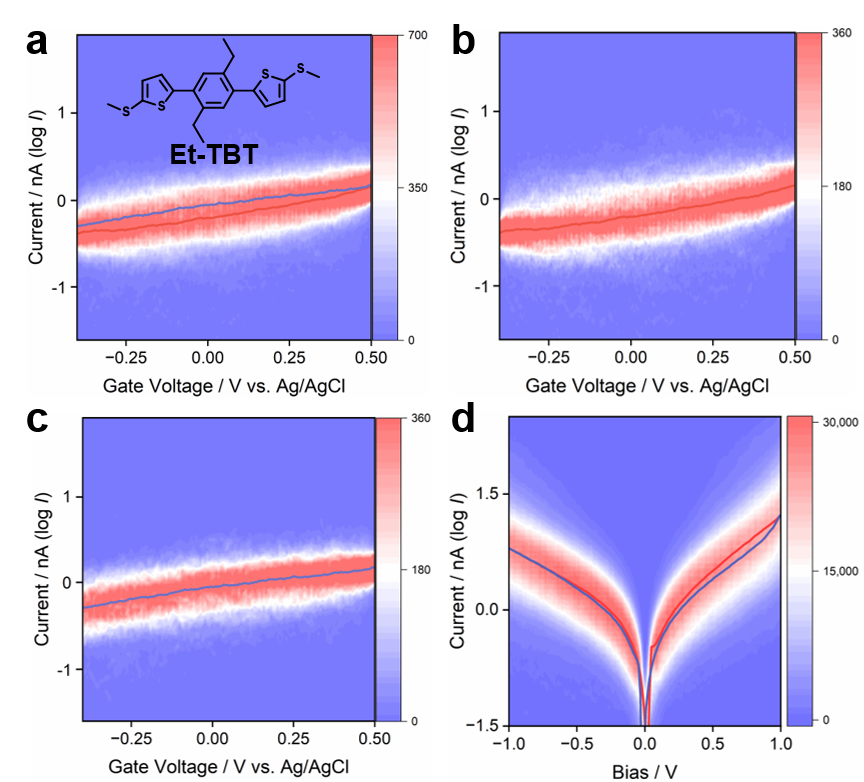


**Fig. S32 Single-molecule electrochemical transistor based on 0.5 mM Et-TBT in PC solution of 0.1 M TBAPF6 without intramolecular S-O noncovalent interaction. a, b, c,** Statistical *I*-*V*G curves (over 400 traces) illustrate both forward and reverse scans for single-molecule transistors utilizing **Et-TBT** under 0.1 V bias and fitting curves (depicted in the inset). The orange curve represents the forward scan data, while the blue curve corresponds to the reverse scan data. **d,** Statistical *I*-*V*B characteristic curves (over 2000 traces) and fitting curves (depicted in the inset) represent both forward and reverse scans at the electrode potential of –0.4 V for single-molecule transistors utilizing **Et-TBT**. The orange curve represents the forward scan data, while the blue curve corresponds to the reverse scan data.





**Fig. S33 Cyclic voltammetry curve of 0.5 mM Et-TBT without intramolecular S-O noncovalent interaction in PC of 0.1 M TBAPF6 at the electrode potentials in non-Faradaic region (gate voltage *V*G = –0.4~0.5 V).**


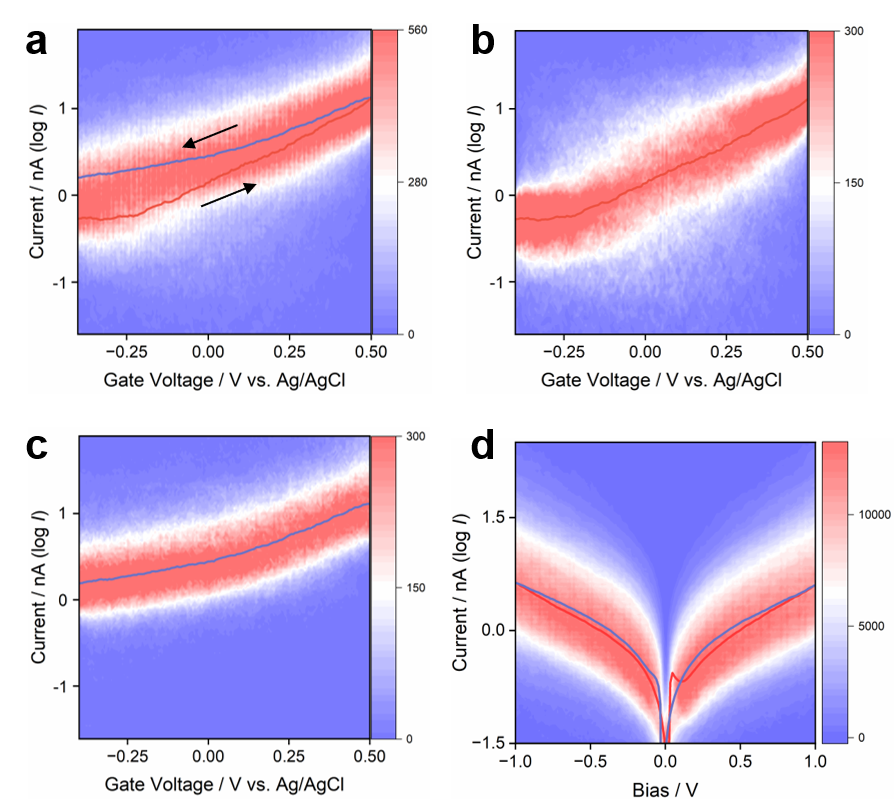


**Fig. S34 Single-molecule electrochemical transistor based on 0.5 mM MeO-TBT in PC solution of 0.2 M TBABF4. a, b, c,** Statistical transfer characteristic (*I*-*V*G) curves (over 400 traces) illustrate both forward and reverse scans, and fitting curves (depicted in the inset) for single-molecule transistors under 0.1 V bias. **d,** Statistical *I*-*V*B characteristic curves (over 2000 traces) and fitting curves (depicted in the inset) represent both forward and reverse scans at the electrode potential of –0.4 V for the single-molecule transistor utilizing **MeO-TBT**. The orange curve represents the forward scan data, while the blue curve corresponds to the reverse scan data.


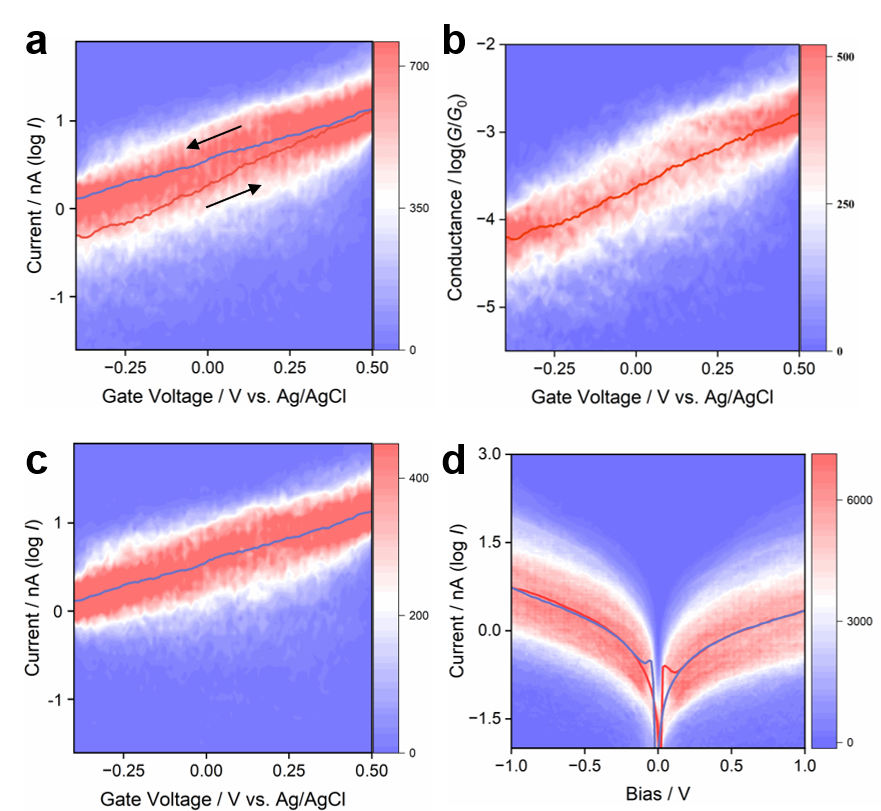


**Fig. S35 Single-molecule electrochemical transistor based on 0.5 mM MeO-TBT in PC solution of 0.2 M LiTFSI. a, b,** **c,** Statistical transfer characteristic (*I*-*V*G) curves (over 400 traces) illustrate both forward and reverse scans, and fitting curves (depicted in the inset) for single-molecule transistors under 0.1 V bias. **d,** Statistical *I*-*V*B characteristic curves (over 2000 traces) and fitting curves (depicted in the inset) represent both forward and reverse scans at the electrode potential of –0.4 V for the single-molecule transistor utilizing **MeO-TBT**. The orange curve represents the forward scan data, while the blue curve corresponds to the reverse scan data.


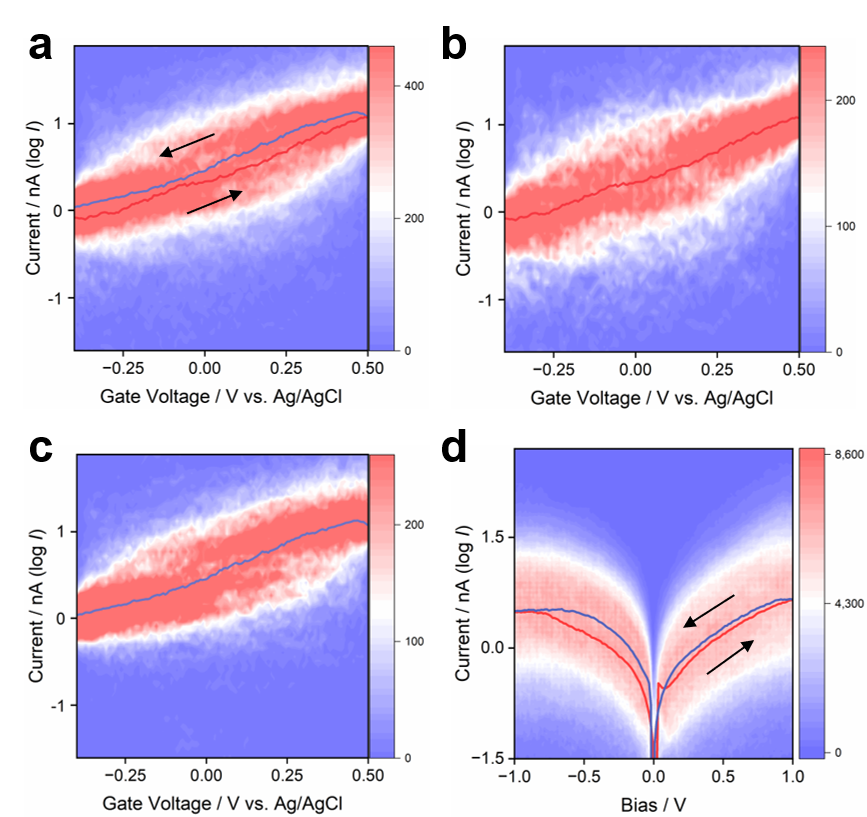


**Fig. S36 Single-molecule electrochemical transistor based on 0.5 mM MeO-TBT in PC solution of 0.05 M TEAPF6. a, b,** **c,** Statistical transfer characteristic (*I*-*V*G) curves (over 400 traces) illustrate both forward and reverse scans, and fitting curves (depicted in the inset) for single-molecule transistors under 0.1 V bias. **d,** Statistical *I*-*V*B characteristic curves (over 2000 traces) and fitting curves (depicted in the inset) represent both forward and reverse scans at the electrode potential of –0.4 V for the single-molecule transistor utilizing **MeO-TBT**. The orange curve represents the forward scan data, while the blue curve corresponds to the reverse scan data.

**Table S5 Conductivity of different electrolytes**

| **Concentration / M** | **Conductivity of TBAPF6 / (μS cm-1)** | **Conductivity of TEAPF6 / (μS cm-1)** | **Conductivity of TBABF4 / (μS cm-1)** |
| --- | --- | --- | --- |
| 0.01 | 223 | 278 | 251 |
| 0.02 | 420 | 530 | 482 |
| 0.03 | 620 | 780 | 714 |
| 0.04 | 832 | 1031 | 950 |
| 0.05 | 1030 | 1283 | 1185 |

**S5 Movie S1:** **Ion migration under bidirectional electric fields (*X*/*Y*-axes) simulated via non-equilibrium molecular dynamics**

**References**

1 Wang, Y. *et al.* Dynamic molecular switches with hysteretic negative differential conductance emulating synaptic behaviour. *Nat. Mater.* **21**, 1403-1411 (2022).

2 Xiong, T. *et al.* Neuromorphic functions with a polyelectrolyte-confined fluidic memristor. *Science* **379**, 156-161 (2023).

3 Xu, W., Min, S.-Y., Hwang, H. & Lee, T.-W. Organic core-sheath nanowire artificial synapses with femtojoule energy consumption. *Sci. Adv.* **2**, e1501326 (2016).

4 Liu, D. *et al.* A wearable in-sensor computing platform based on stretchable organic electrochemical transistors. *Nat. Electron.* **7**, 1176-1185 (2024).

5 Xu, Z., Chen, G., Chen, S. & Xu, H. Mimicking pain conditioning using an electrolyte-gated organic synaptic transistor. *Adv. Mater. Technol.* **9**, 2302047 (2024).

6 Bai, J. *et al.* Full van der Waals ambipolar ferroelectric configurable optical hetero-synapses for in-sensor computing. *Adv. Mater.* **36**, 2401060 (2024).

7 Liu, L. *et al.* Rational design of fluorinated 2D polymer film based on donor–accepter architecture toward multilevel memory device for neuromorphic computing. *Adv. Mater.* **36**, 2405328 (2024).

8 Liu, R. *et al.* Versatile neuromorphic modulation and biosensing based on n-type small-molecule organic mixed ionic-electronic conductors. *Angew. Chem. Int. Ed.* **63**, e202315537 (2024).

9 Xu, H. *et al.* A low-power vertical dual-gate neurotransistor with short-term memory for high energy-efficient neuromorphic computing. *Nat. Commun.* **14**, 6385 (2023).

10 Li, Z. *et al.* Crossmodal sensory neurons based on high-performance flexible memristors for human-machine in-sensor computing system. *Nat. Commun.* **15**, 7275 (2024).

11 Zhang, H.-T. *et al.* Reconfigurable perovskite nickelate electronics for artificial intelligence. *Science* **375**, 533-539 (2022).

12 Harikesh, P. C. *et al.* Ion-tunable antiambipolarity in mixed ion–electron conducting polymers enables biorealistic organic electrochemical neurons. *Nat. Mater.* **22**, 242-248 (2023).

13 Sarkar, T. *et al.* An organic artificial spiking neuron for in situ neuromorphic sensing and biointerfacing. *Nat. Electron.* **5**, 774-783 (2022).

14 Liu, G. *et al.* Ultralow-power and multisensory artificial synapse based on electrolyte-gated vertical organic transistors. *Adv. Funct. Mater.* **32**, 2200959 (2022).

15 Zhang, Y. *et al.* High-performance organic electrochemical transistors and neuromorphic devices comprising naphthalenediimide-dialkoxybithiazole copolymers bearing glycol ether pendant groups. *Adv. Funct. Mater.* **32**, 2201593 (2022).

16 Chen, S. *et al.* Artificial organic afferent nerves enable closed-loop tactile feedback for intelligent robot. *Nat. Commun.* **15**, 7056 (2024).

17 Ham, S. *et al.* Artificial neuromodulator–synapse mimicked by a three-terminal vertical organic ferroelectric barristor for fast and energy-efficient neuromorphic computing. *Nano Energy* **124**, 109435 (2024).

18 Liu, J. *et al.* Vertically integrated monolithic neuromorphic nanowire device for physiological information processing. *Nano Lett.* **24**, 4336-4345 (2024).

19 Xie, T. *et al.* Carbon nanotube optoelectronic synapse transistor arrays with ultra-low power consumption for stretchable neuromorphic vision systems. *Adv. Funct. Mater.* **33**, 2303970 (2023).

20 Bu, Y. *et al.* Ferroelectrics-electret synergetic organic artificial synapses with single-polarity driven dynamic reconfigurable modulation. *Adv. Funct. Mater.* **33**, 2213741 (2023).

21 Ni, Y. *et al.* A fibrous neuromorphic device for multi-level nerve pathways implementing knee jerk reflex and cognitive activities. *Nano Energy* **104**, 107898 (2022).

22 Zhao, Y. *et al.* Donor engineering tuning the analog switching range and operational stability of organic synaptic transistors for neuromorphic systems. *Adv. Funct. Mater.* **32**, 2205744 (2022).

23 Xie, Z. *et al.* All-solid-state vertical three-terminal n-type organic synaptic devices for neuromorphic computing. *Adv. Funct. Mater.* **32**, 2107314 (2022).

24 Yao, J. *et al.* Ultra-low power carbon nanotube/porphyrin synaptic arrays for persistent photoconductivity and neuromorphic computing. *Nat. Commun.* **15**, 6147 (2024).

25 Yan, X. *et al.* Moiré synaptic transistor with room-temperature neuromorphic functionality. *Nature* **624**, 551-556 (2023).

26 Pazos, S. *et al.* Synaptic and neural behaviours in a standard silicon transistor. *Nature* **640**, 69-76 (2025).

27 Kim, S. J. *et al.* Linearly programmable two-dimensional halide perovskite memristor arrays for neuromorphic computing. *Nat. Nanotechnol.* **20**, 83-92 (2025).

28 Prezioso, M. *et al.* Training and operation of an integrated neuromorphic network based on metal-oxide memristors. *Nature* **521**, 61-64 (2015).

29 Weilenmann, C. *et al.* Single neuromorphic memristor closely emulates multiple synaptic mechanisms for energy efficient neural networks. *Nat. Commun.* **15**, 6898, (2024).

30 Zhang, Y. *et al.* An artificial synapse based on molecular junctions. *Nat. Commun.* **14**, 247 (2023).

31 Sharma, D. *et al.* Linear symmetric self-selecting 14-bit kinetic molecular memristors. *Nature* **633**, 560-566 (2024).

32 Kwon, W., Jeon, J., Hutin, L., Liu, T. J. K. Electromechanical diode cell for cross-point nonvolatile memory arrays. *IEEE Electron Device Lett.* **33**, 131-133 (2012).

33 2022 International Roadmap for Devices and Systems (Tech. Rep., IEEE, 2022); https://irds.ieee.org.

34 Kam, H., Liu, T. J. K., Stojanović, V., Marković, D. & Alon, E. Design, optimization, and scaling of MEM relays for ultra-low-power digital logic. *IEEE Trans. Electron Devices* **58**, 236-250 (2011).
